# Supplementary material for: Platinum(IV) Prodrugs Incorporating an Indole-Based Derivative, 5-Benzyloxyindole-3-Acetic Acid in the Axial Position Exhibit Prominent Anticancer Activity
Source: MDPI journal article supplement (doi:10.3390/ijms25042181), 2024-02-11
Supplement: s1 [file s1]

# SUPPLEMENTARY MATERIALS

## **Platinum(IV) Prodrugs Incorporating an Indole-Based Derivative, 5-Benzyloxyindole-3-Acetic Acid in the Axial Position Exhibit Prominent Anticancer Activity**

Angelico D. Aputen,<sup>1</sup> Maria George Elias,<sup>1,2</sup> Jayne Gilbert,<sup>3</sup> Jennette A. Sakoff,<sup>3</sup> Christopher P. Gordon,<sup>1</sup> Kieran F. Scott<sup>2,4</sup> and Janice R. Aldrich-Wright <sup>1\*</sup>

<sup>1</sup>School of Science, Western Sydney University, Sydney, NSW 2751, Australia

<sup>2</sup>Ingham Institute, Sydney, NSW 2170, Australia

<sup>3</sup>Calvary Mater Newcastle Hospital, Newcastle, NSW 2298, Australia

<sup>4</sup>School of Medicine, Western Sydney University, Sydney, NSW 2751, Australia

\* Correspondence: [j.aldrich-wright@westernsydney.edu.au](mailto:j.aldrich-wright@westernsydney.edu.au)

# Table of Contents

|                   |                                                                                                                                                                                                          |    |
|-------------------|----------------------------------------------------------------------------------------------------------------------------------------------------------------------------------------------------------|----|
| <b>Figure S1</b>  | HPLC chromatogram of NHS-5B3A at 254 nm with product peak trace at 11.8 min.                                                                                                                             | 5  |
| <b>Figure S2</b>  | $^1\text{H}$ -NMR spectrum of NHS-5B3A in DMSO- $\text{d}_6$ .                                                                                                                                           | 5  |
| <b>Figure S3</b>  | 2D-COSY spectrum of NHS-5B3A in DMSO- $\text{d}_6$ , highlighting the coupling of indole protons.                                                                                                        | 6  |
| <b>Figure S4</b>  | $^1\text{H}$ -NMR spectrum of 5B3A in DMSO- $\text{d}_6$ .                                                                                                                                               | 6  |
| <b>Figure S5</b>  | 2D-COSY spectrum of NHS-5B3A in DMSO- $\text{d}_6$ .                                                                                                                                                     | 7  |
| <b>Figure S6</b>  | HPLC chromatogram of <b>P-5B3A</b> at 254 nm.                                                                                                                                                            | 7  |
| <b>Figure S7</b>  | HPLC chromatogram of <b>5-5B3A</b> at 254 nm.                                                                                                                                                            | 8  |
| <b>Figure S8</b>  | HPLC chromatogram of <b>56-5B3A</b> at 254 nm.                                                                                                                                                           | 8  |
| <b>Figure S9</b>  | $^1\text{H}$ -NMR spectrum of <b>P-5B3A</b> in DMSO- $\text{d}_6$ .                                                                                                                                      | 9  |
| <b>Figure S10</b> | $^1\text{H}$ -NMR spectrum of <b>5-5B3A</b> in DMSO- $\text{d}_6$ .                                                                                                                                      | 10 |
| <b>Figure S11</b> | $^1\text{H}$ -NMR spectrum of <b>56-5B3A</b> in DMSO- $\text{d}_6$ .                                                                                                                                     | 11 |
| <b>Figure S12</b> | 2D-COSY spectrum of <b>P-5B3A</b> in DMSO- $\text{d}_6$ .                                                                                                                                                | 12 |
| <b>Figure S13</b> | 2D-COSY spectrum of <b>5-5B3A</b> in DMSO- $\text{d}_6$ .                                                                                                                                                | 13 |
| <b>Figure S14</b> | 2D-COSY spectrum of <b>56-5B3A</b> in DMSO- $\text{d}_6$ .                                                                                                                                               | 14 |
| <b>Figure S15</b> | $^1\text{H}$ - $^{195}\text{Pt}$ -HMQC spectrum of <b>P-5B3A</b> in DMSO- $\text{d}_6$ at 400 ppm.                                                                                                       | 15 |
| <b>Figure S16</b> | $^1\text{H}$ - $^{195}\text{Pt}$ -HMQC spectrum of <b>P-5B3A</b> in DMSO- $\text{d}_6$ at -2800 ppm.                                                                                                     | 16 |
| <b>Figure S17</b> | $^1\text{H}$ - $^{195}\text{Pt}$ -HMQC spectrum of <b>5-5B3A</b> in DMSO- $\text{d}_6$ at 400 ppm.                                                                                                       | 17 |
| <b>Figure S18</b> | $^1\text{H}$ - $^{195}\text{Pt}$ -HMQC spectrum of <b>5-5B3A</b> in DMSO- $\text{d}_6$ at -2800 ppm.                                                                                                     | 18 |
| <b>Figure S19</b> | $^1\text{H}$ - $^{195}\text{Pt}$ -HMQC spectrum of <b>56-5B3A</b> in DMSO- $\text{d}_6$ at 400 ppm.                                                                                                      | 19 |
| <b>Figure S20</b> | $^1\text{H}$ - $^{195}\text{Pt}$ -HMQC spectrum of <b>56-5B3A</b> in DMSO- $\text{d}_6$ at -2800 ppm.                                                                                                    | 20 |
| <b>Figure S21</b> | UV spectra of <b>P-5B3A</b> and plot curves at 204, 279 and 304 nm.                                                                                                                                      | 21 |
| <b>Figure S22</b> | UV spectra of <b>5-5B3A</b> and plot curves at 204, 286 and 310 nm.                                                                                                                                      | 22 |
| <b>Figure S23</b> | UV spectra of <b>56-5B3A</b> and plot curves at 206, 250, 291 and 315 nm.                                                                                                                                | 23 |
| <b>Figure S24</b> | CD spectrum of <b>P-5B3A</b> (0.05 mM) acquired after 30 accumulations.                                                                                                                                  | 24 |
| <b>Figure S25</b> | CD spectrum of <b>5-5B3A</b> (0.05 mM) acquired after 30 accumulations.                                                                                                                                  | 24 |
| <b>Figure S26</b> | CD spectrum of <b>56-5B3A</b> (0.05 mM) acquired after 30 accumulations.                                                                                                                                 | 25 |
| <b>Figure S27</b> | Plots of log k versus concentration of the organic solvent, $\text{CH}_3\text{CN}$ to determine the chromatographic lipophilicity index, log $k_w$ of <b>P-5B3A</b> , <b>5-5B3A</b> and <b>56-5B3A</b> . | 26 |

|                   |                                                                                                                                                                                                                                                                                                                              |    |
|-------------------|------------------------------------------------------------------------------------------------------------------------------------------------------------------------------------------------------------------------------------------------------------------------------------------------------------------------------|----|
| <b>Figure S28</b> | Preliminary 1D- <sup>195</sup> Pt-NMR spectra of <b>P-5B3A</b> with PBS in DMSO-d <sub>6</sub> within the regions of 400 and –2800 ppm and at 37 °C                                                                                                                                                                          | 27 |
| <b>Figure S29</b> | Preliminary 1D- <sup>195</sup> Pt-NMR spectra of <b>5-5B3A</b> with PBS in DMSO-d <sub>6</sub> within the regions of 400 and –2800 ppm and at 37 °C.                                                                                                                                                                         | 28 |
| <b>Figure S30</b> | Preliminary 1D- <sup>195</sup> Pt-NMR spectra of <b>56-5B3A</b> with PBS in DMSO-d <sub>6</sub> within the regions of 400 and –2800 ppm and at 37 °C.                                                                                                                                                                        | 29 |
| <b>Figure S31</b> | <sup>1</sup> H-NMR spectra of <b>P-5B3A</b> with PBS and AsA in DMSO-d <sub>6</sub> at 37 °C, in different time intervals, displaying the shift in chemical multiplicity. <b>T</b> is time in min.                                                                                                                           | 30 |
| <b>Figure S32</b> | 1D- <sup>195</sup> Pt-NMR spectra of <b>P-5B3A</b> with PBS and AsA in DMSO-d <sub>6</sub> , within the regions of 400 and –2800 ppm at 37 °C, displaying its complete reduction after 2 h from the final <sup>1</sup> H-NMR experiment.                                                                                     | 31 |
| <b>Figure S33</b> | <sup>1</sup> H-NMR spectra of <b>5-5B3A</b> with PBS and AsA in DMSO-d <sub>6</sub> at 37 °C, in different time intervals, displaying the shift in chemical multiplicity. <b>T</b> is time in min.                                                                                                                           | 32 |
| <b>Figure S34</b> | 1D- <sup>195</sup> Pt-NMR spectra of <b>5-5B3A</b> with PBS and AsA in DMSO-d <sub>6</sub> , within the regions of 400 and –2800 ppm at 37 °C, displaying its complete reduction after 2 h from the final <sup>1</sup> H-NMR experiment.                                                                                     | 33 |
| <b>Figure S35</b> | <sup>1</sup> H-NMR spectra of <b>56-5B3A</b> with PBS and AsA in DMSO-d <sub>6</sub> at 37 °C, in different time intervals, displaying the shift in chemical multiplicity. <b>T</b> is time in min.                                                                                                                          | 34 |
| <b>Figure S36</b> | 1D- <sup>195</sup> Pt-NMR spectra of <b>56-5B3A</b> with PBS and AsA in DMSO-d <sub>6</sub> , within the regions of 400 and –2800 ppm at 37 °C, displaying its complete reduction after 1 h from the final <sup>1</sup> H-NMR experiment.                                                                                    | 35 |
| <b>Figure S37</b> | Combined HPLC chromatograms acquired for <b>P-5B3A</b> , <b>5-5B3A</b> and <b>56-5B3A</b> at 254 nm after treatment with PBS at 37 °C, at 0, 36 and 72 h.                                                                                                                                                                    | 36 |
| <b>Figure S38</b> | Combined HPLC chromatograms acquired for <b>P-5B3A</b> , <b>5-5B3A</b> and <b>56-5B3A</b> at 254 nm after treatment with PBS at 37 °C, at 120 h and 1 week.                                                                                                                                                                  | 37 |
| <b>Figure S39</b> | ROS production upon treatment with <b>P-5B3A</b> , <b>5-5B3A</b> and <b>56-5B3A</b> , and cisplatin in HT29 colon cells at 0, 0.25, 0.5, 1, 3, 6, 12, 24, 48 and 72 h. TBHP: tert-butyl hydroperoxide. Data points denote mean ± SEM. <i>n</i> = 3 from three independent experiments where samples were run in triplicates. | 38 |
| <b>Figure S40</b> | ROS generation in HT29 colon cells after treatment with <b>P-5B3A</b> , <b>5-5B3A</b> and <b>56-5B3A</b> , <b>5B3A</b> , the equivalent platinum(II) precursors ( <b>PHENSS</b> , <b>5MESS</b> and <b>56MESS</b> ) and platinum(IV)                                                                                          | 39 |

scaffolds (PHENSS(IV)(OH)<sub>2</sub>, 5MESS(IV)(OH)<sub>2</sub> and 56MESS(IV)(OH)<sub>2</sub>), and cisplatin at 24, 48 and 72 h. Data are expressed in RFU values. The RFU values of the platinum(II) precursors (PHENSS, 5MESS and 56MESS) and the platinum(IV) scaffolds (PHENSS(IV)(OH)<sub>2</sub>, 5MESS(IV)(OH)<sub>2</sub> and 56MESS(IV)(OH)<sub>2</sub>) were included in the diagrams for comparison. Data points signify mean ± SEM. *n* = 3 from three independent tests where samples were achieved in triplicate. Significance was identified by Tukey's multiple comparisons test for multiple comparisons compared with cisplatin, as measured by one-way ANOVA.

**Figure S41** The detected MtMP changes in HT29 colon cells after treatment 40  
with **P-5B3A**, **5-5B3A** and **56-5B3A**, 5B3A, the equivalent platinum(II) precursors (PHENSS, 5MESS and 56MESS) and platinum(IV) scaffolds (PHENSS(IV)(OH)<sub>2</sub>, 5MESS(IV)(OH)<sub>2</sub> and 56MESS(IV)(OH)<sub>2</sub>), and cisplatin at 24, 48 and 72 h. Data are expressed in RFU values. Data points signify mean ± SEM. *n* = 3 from three independent tests where samples were achieved in triplicate. Significance was identified by Tukey's multiple comparisons test for multiple comparisons. Group differences were considered statistically significant if \* *p* < 0.05, \*\* *p* < 0.01, \*\*\* *p* < 0.001 and \*\*\*\* *p* < 0.0001 compared with cisplatin, as measured by one-way ANOVA.

**Figure S42** HDAC activity upon treatment with **P-5B3A**, **5-5B3A** and **56- 41**  
**5B3A**, 5B3A, the equivalent platinum(II) precursors (PHENSS, 5MESS and 56MESS) and platinum(IV) scaffolds (PHENSS(IV)(OH)<sub>2</sub>, 5MESS(IV)(OH)<sub>2</sub> and 56MESS(IV)(OH)<sub>2</sub>), and cisplatin at 72 h. Data points signify mean ± SEM. *n* = 3 from three independent experiments where samples were conducted in triplicate. Significance was identified by Tukey's multiple comparisons test for multiple comparisons. Group differences were considered statistically significant if \*\* *p* < 0.01 and \*\*\* *p* < 0.001 compared with cisplatin, as measured by one-way ANOVA.

## HPLC Chromatogram of NHS-5B3A

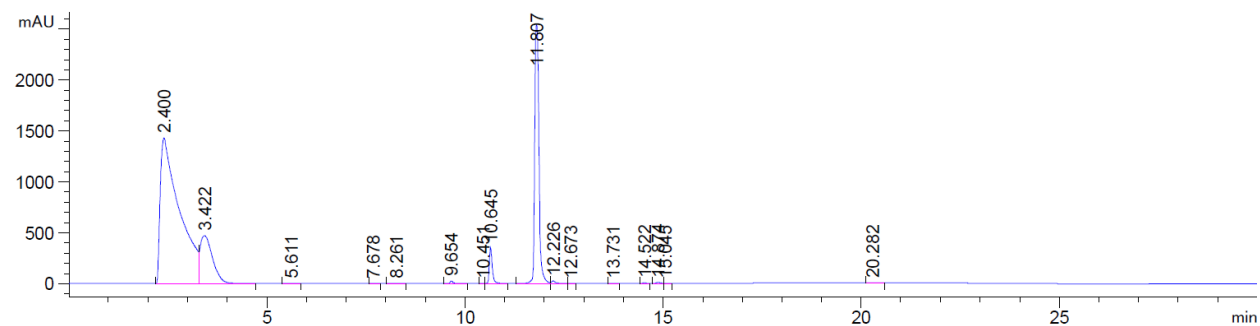

**Figure S1:** HPLC chromatogram of NHS-5B3A at 254 nm with product peak trace at 11.8 min.

## <sup>1</sup>H-NMR Spectra of NHS-5B3A

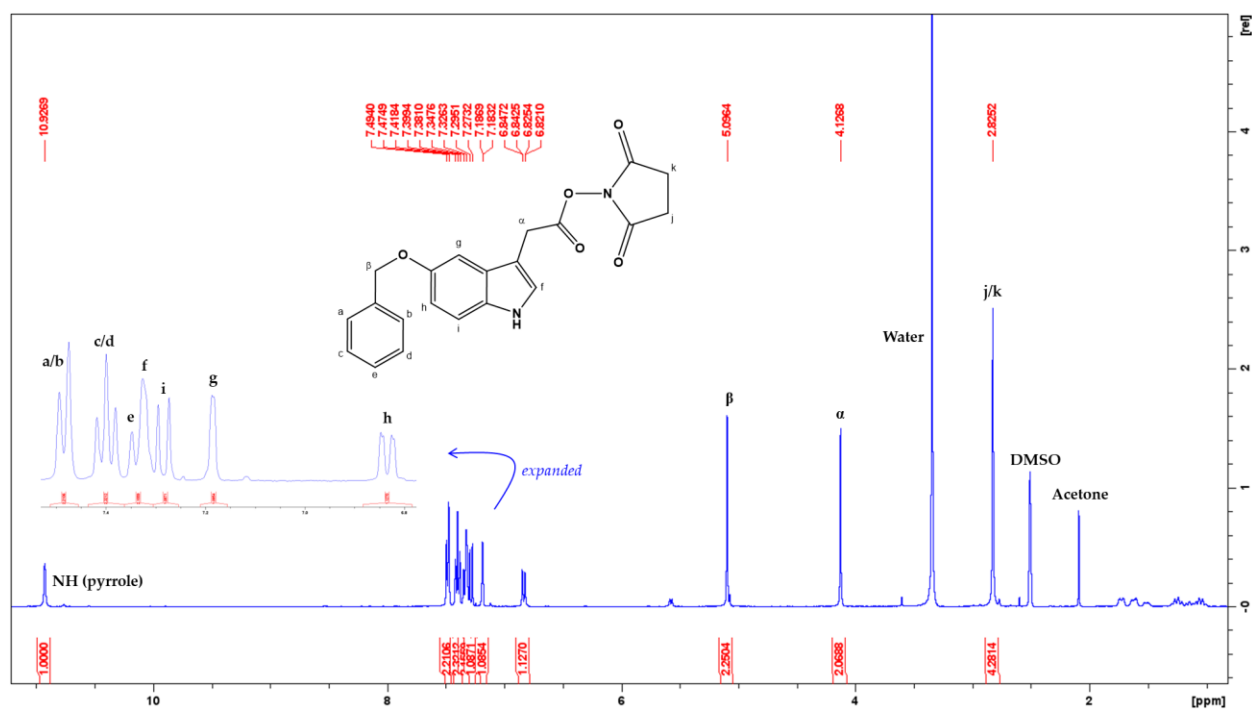

**Figure S2:** <sup>1</sup>H-NMR spectrum of NHS-5B3A in DMSO-d<sub>6</sub>.

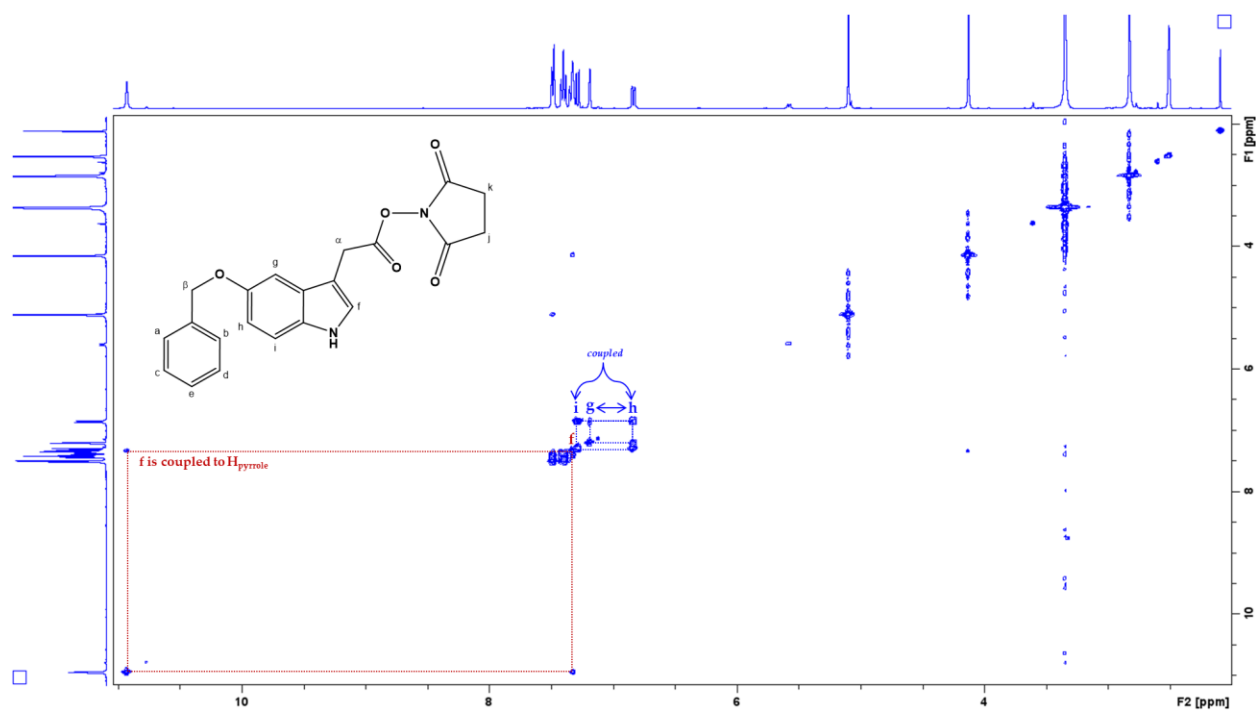

**Figure S3:** 2D-COSY spectrum of NHS-5B3A in DMSO-d<sub>6</sub>, highlighting the coupling of indole protons.

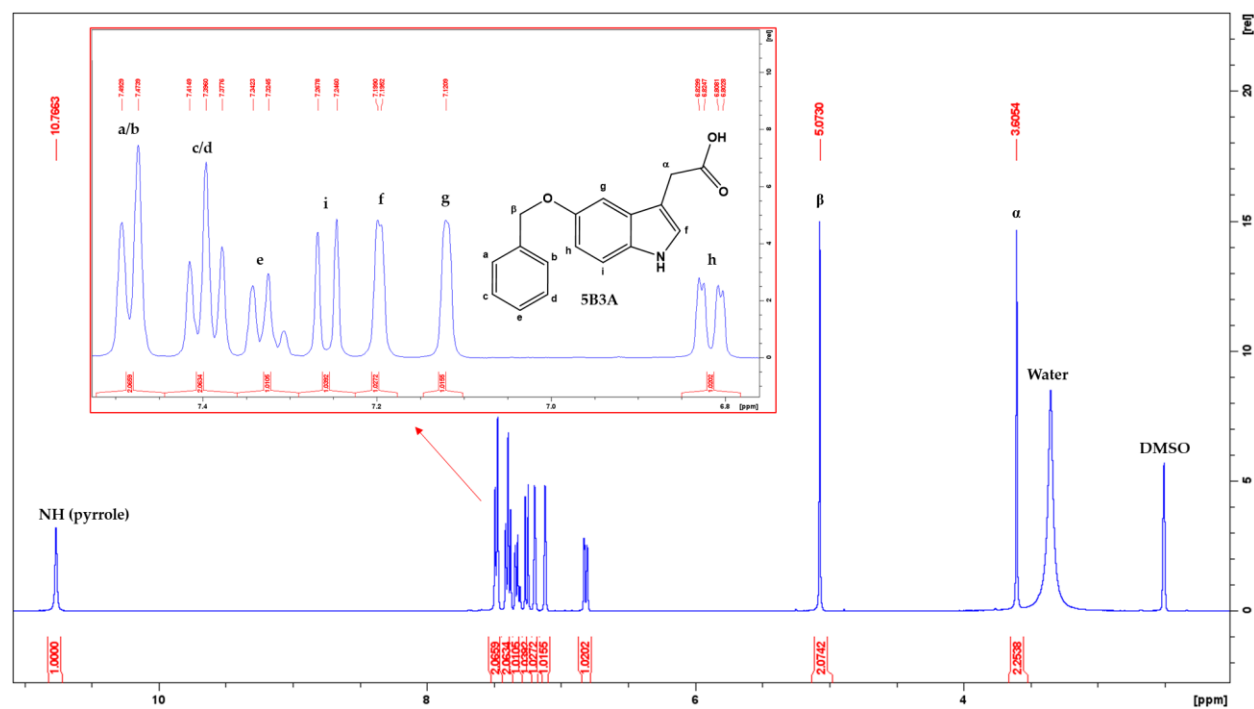

**Figure S4:** <sup>1</sup>H-NMR spectrum of 5B3A in DMSO-d<sub>6</sub>.

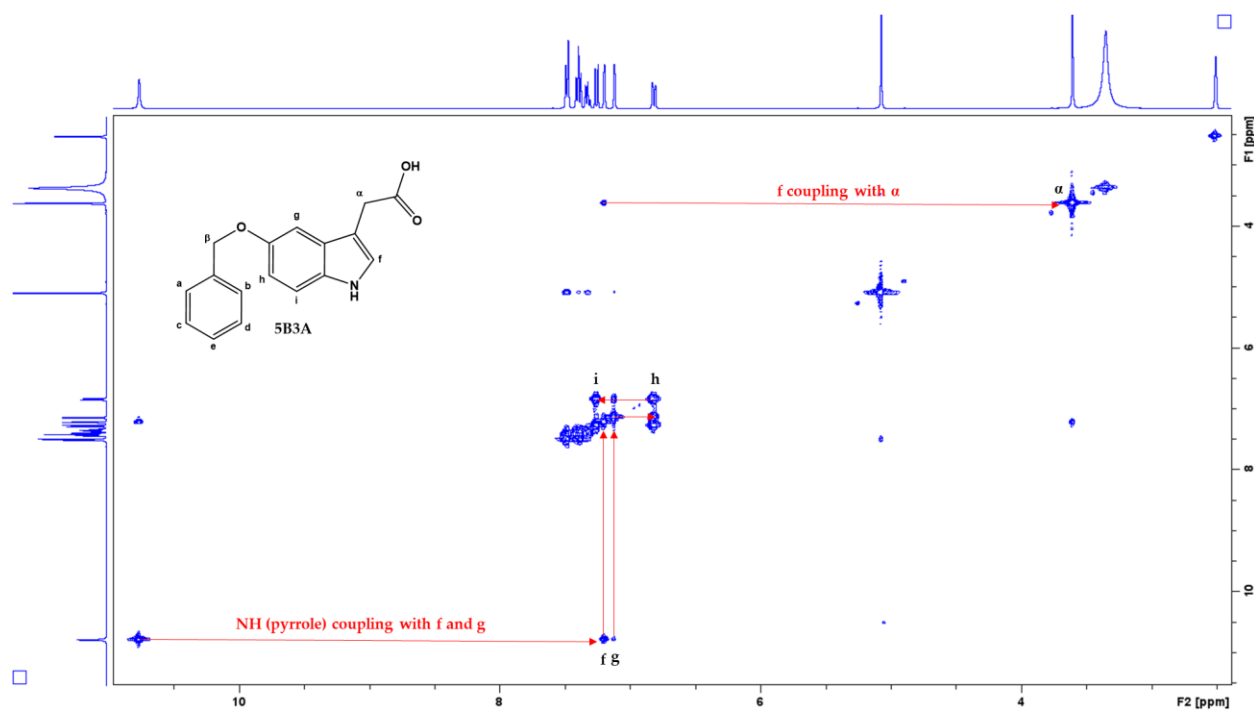

**Figure S5:** 2D-COSY spectrum of 5B3A in DMSO- $d_6$ , highlighting the coupling of indole protons.

### HPLC Chromatograms of P-5B3A, 5-5B3A and 56-5B3A

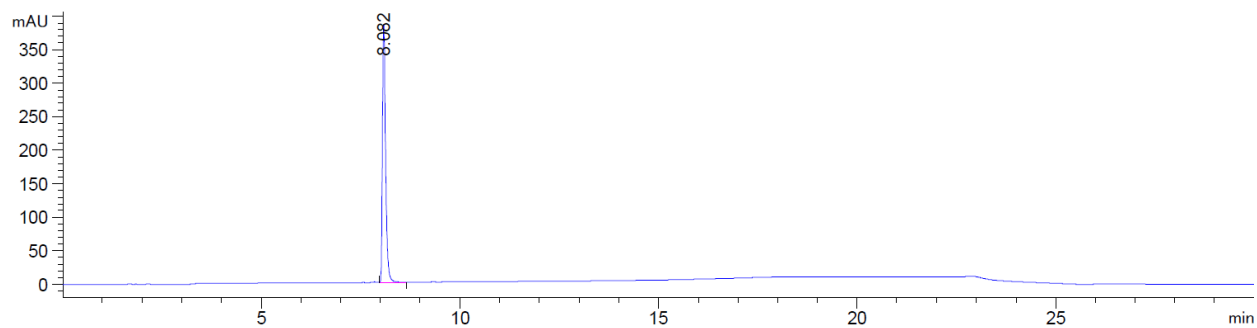

**Figure S6:** HPLC chromatogram of P-5B3A at 254 nm.

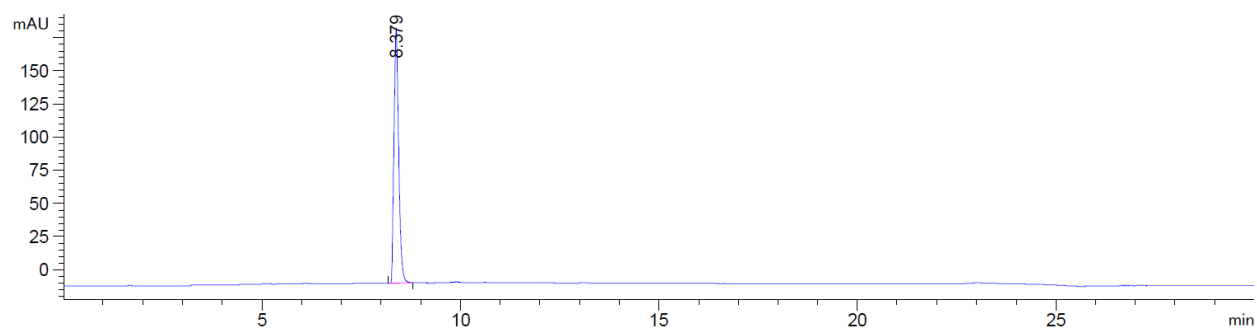

**Figure S7:** HPLC chromatogram of **5-5B3A** at 254 nm.

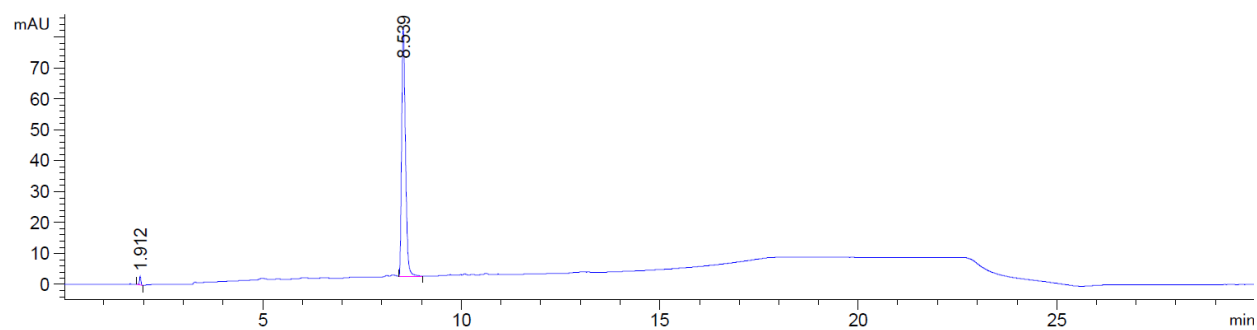

**Figure S8:** HPLC chromatogram of **56-5B3A** at 254 nm.

### <sup>1</sup>H-NMR Spectra of P-5B3A, 5-5B3A and 56-5B3A

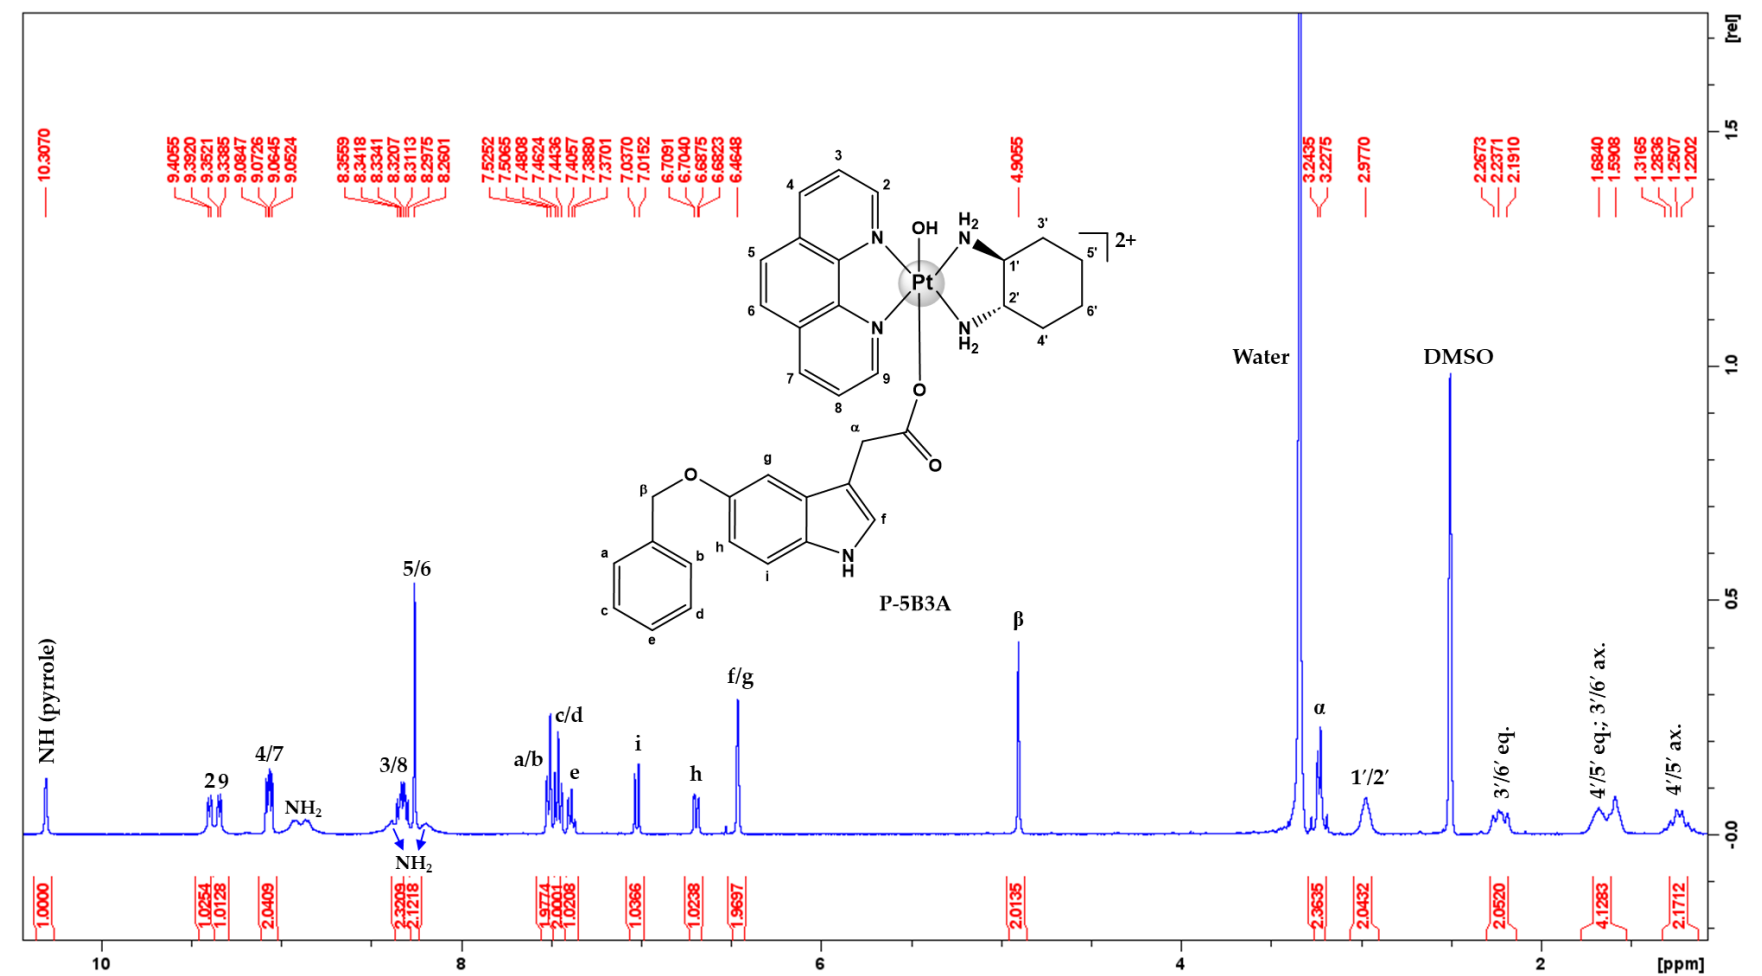

**Figure S9:**  $^1\text{H}$ -NMR spectrum of **P-5B3A** in  $\text{DMSO-d}_6$ .

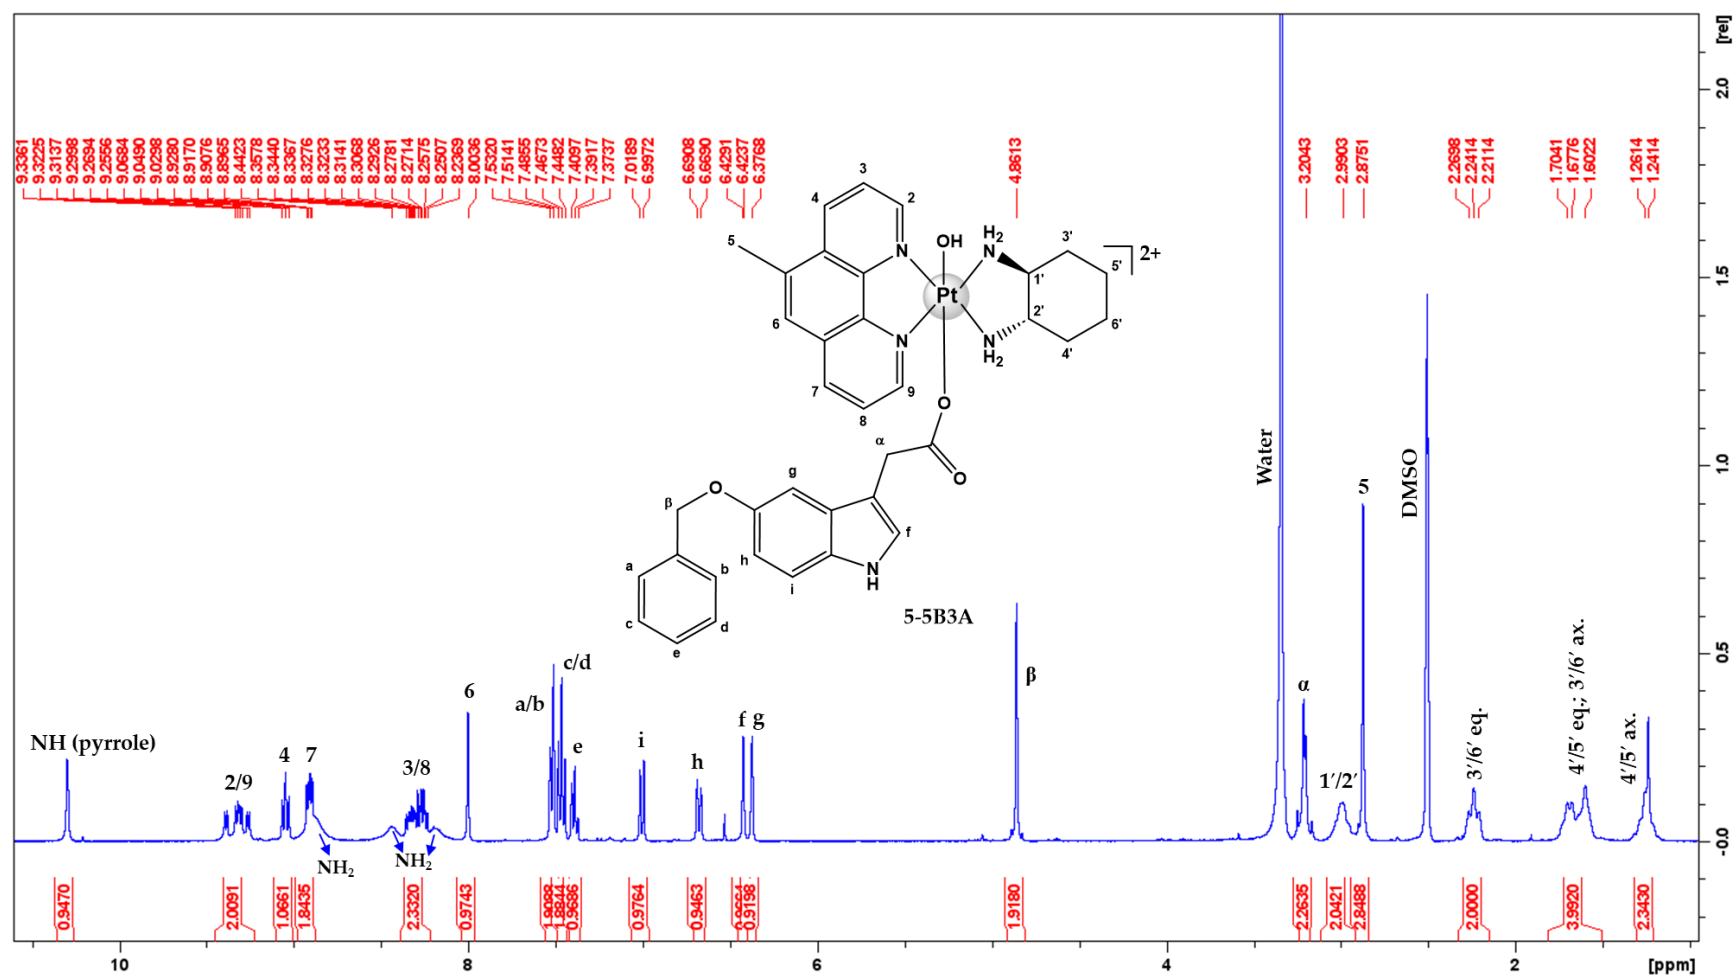

**Figure S10:**  $^1\text{H}$ -NMR spectrum of 5-5B3A in  $\text{DMSO-d}_6$ .

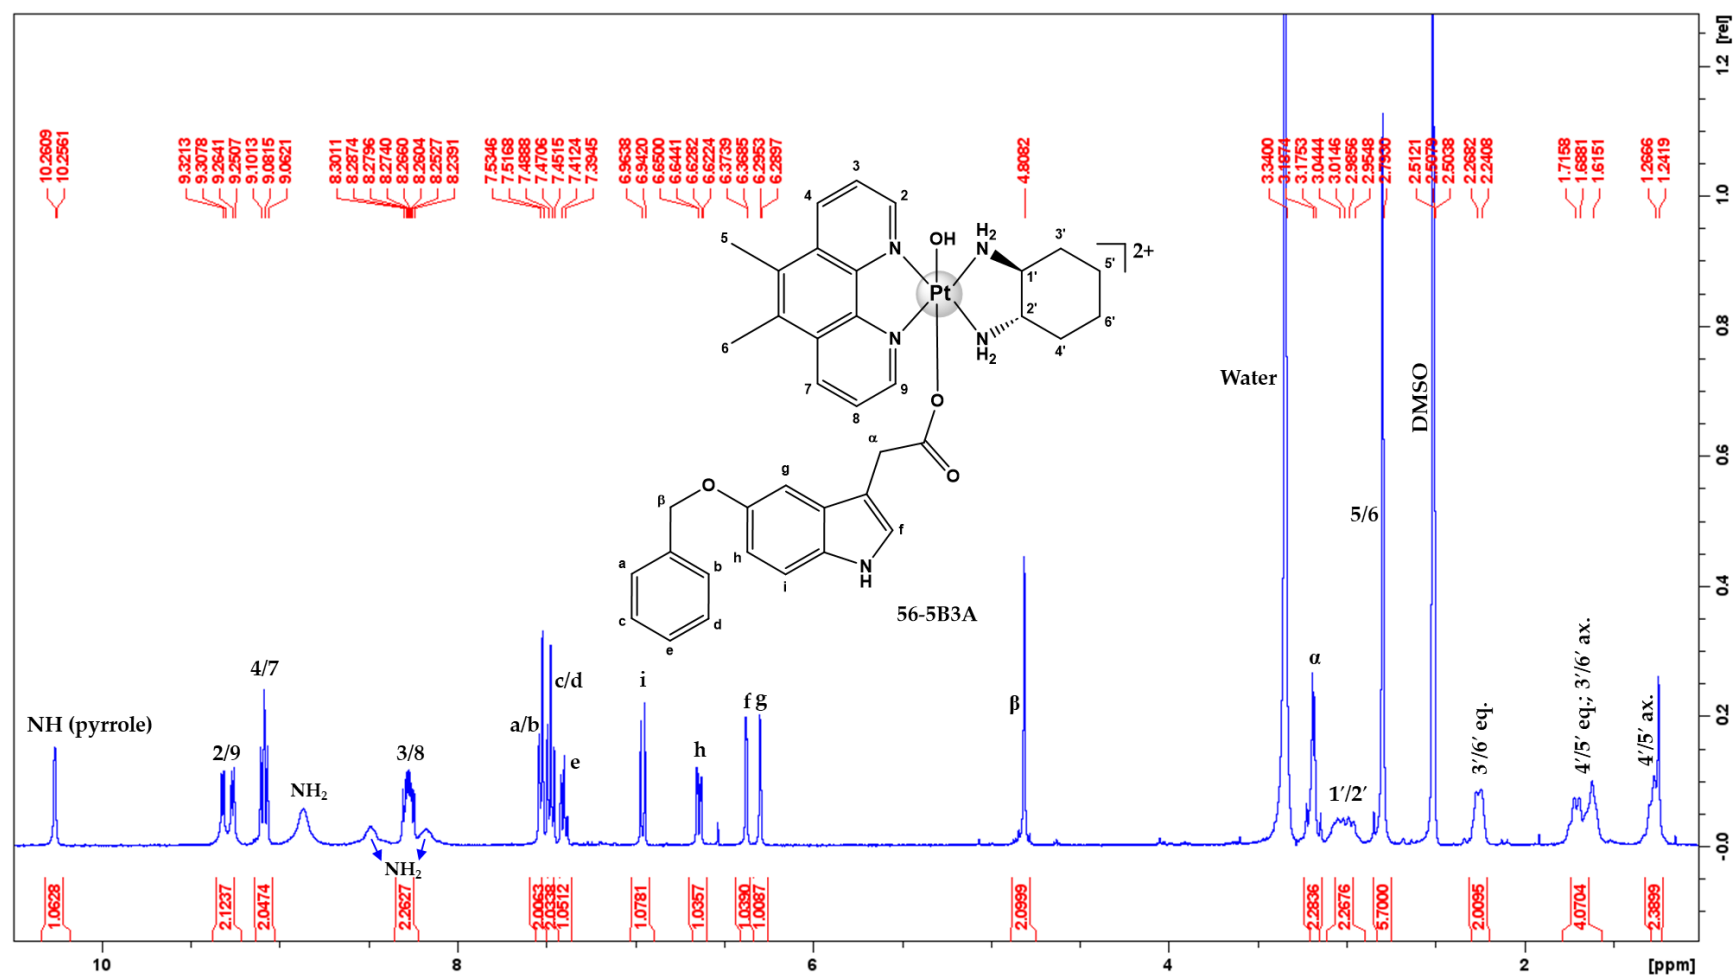

Figure S11:  $^1\text{H}$ -NMR spectrum of 56-5B3A in DMSO- $d_6$ .

## 2D-COSY Spectra of P-5B3A, 5-5B3A and 56-5B3A

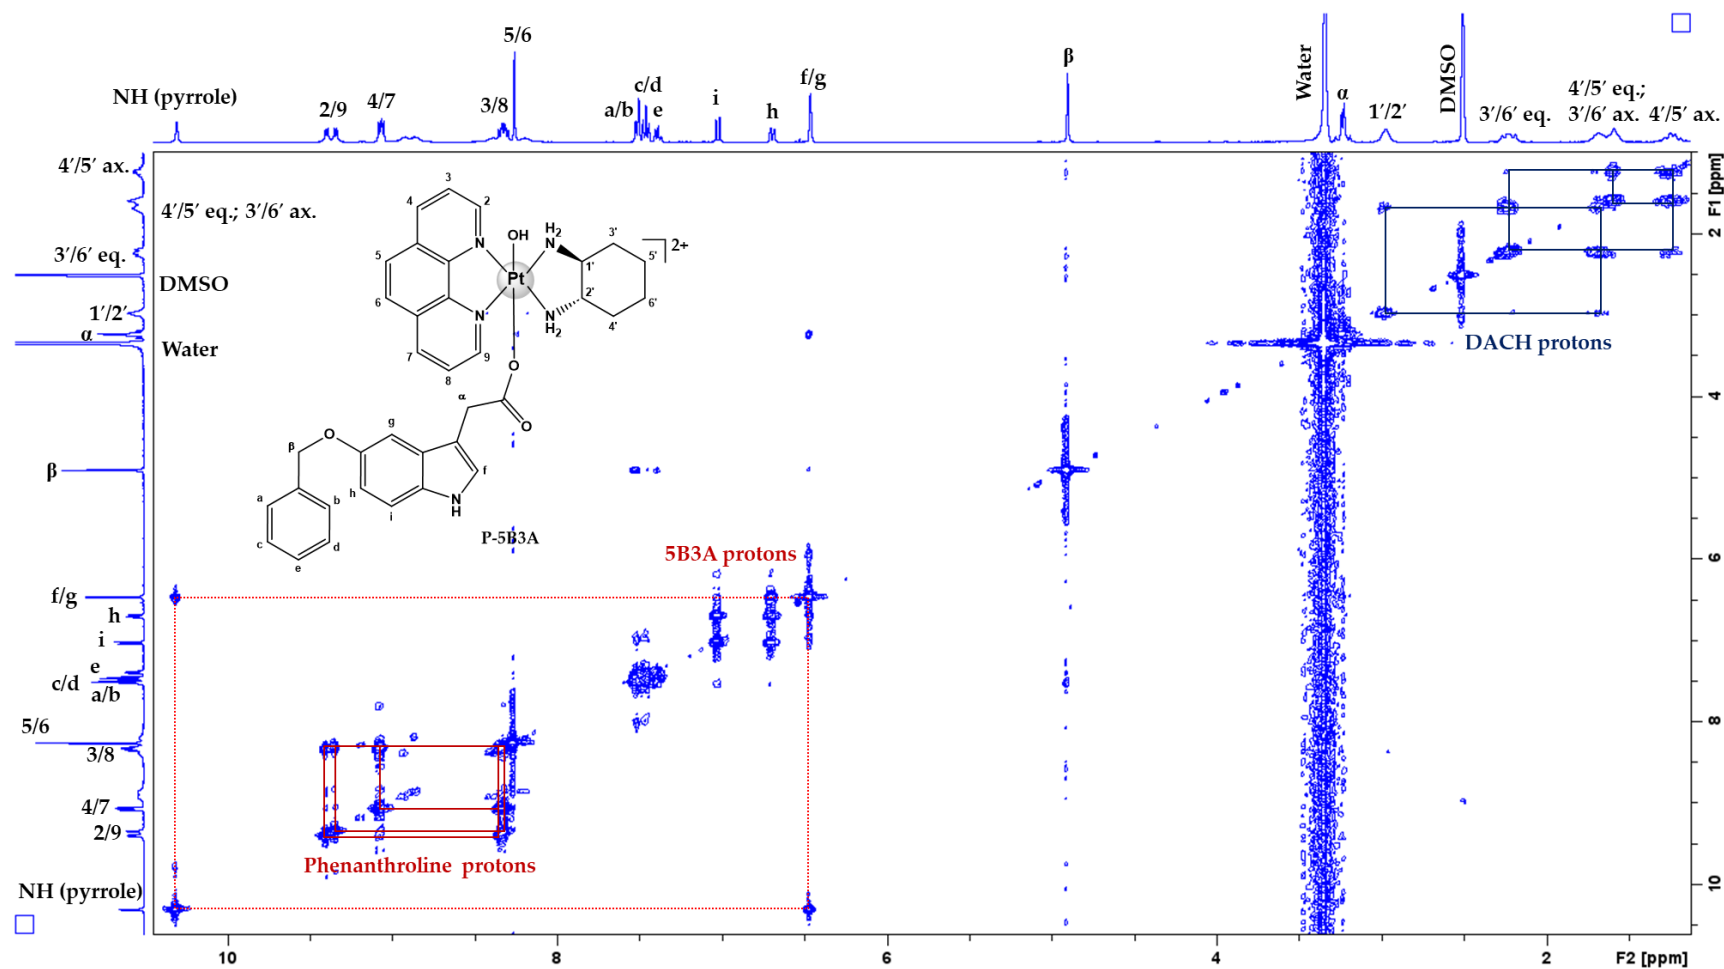

Figure S12: 2D-COSY spectrum of P-5B3A in DMSO-d<sub>6</sub>.

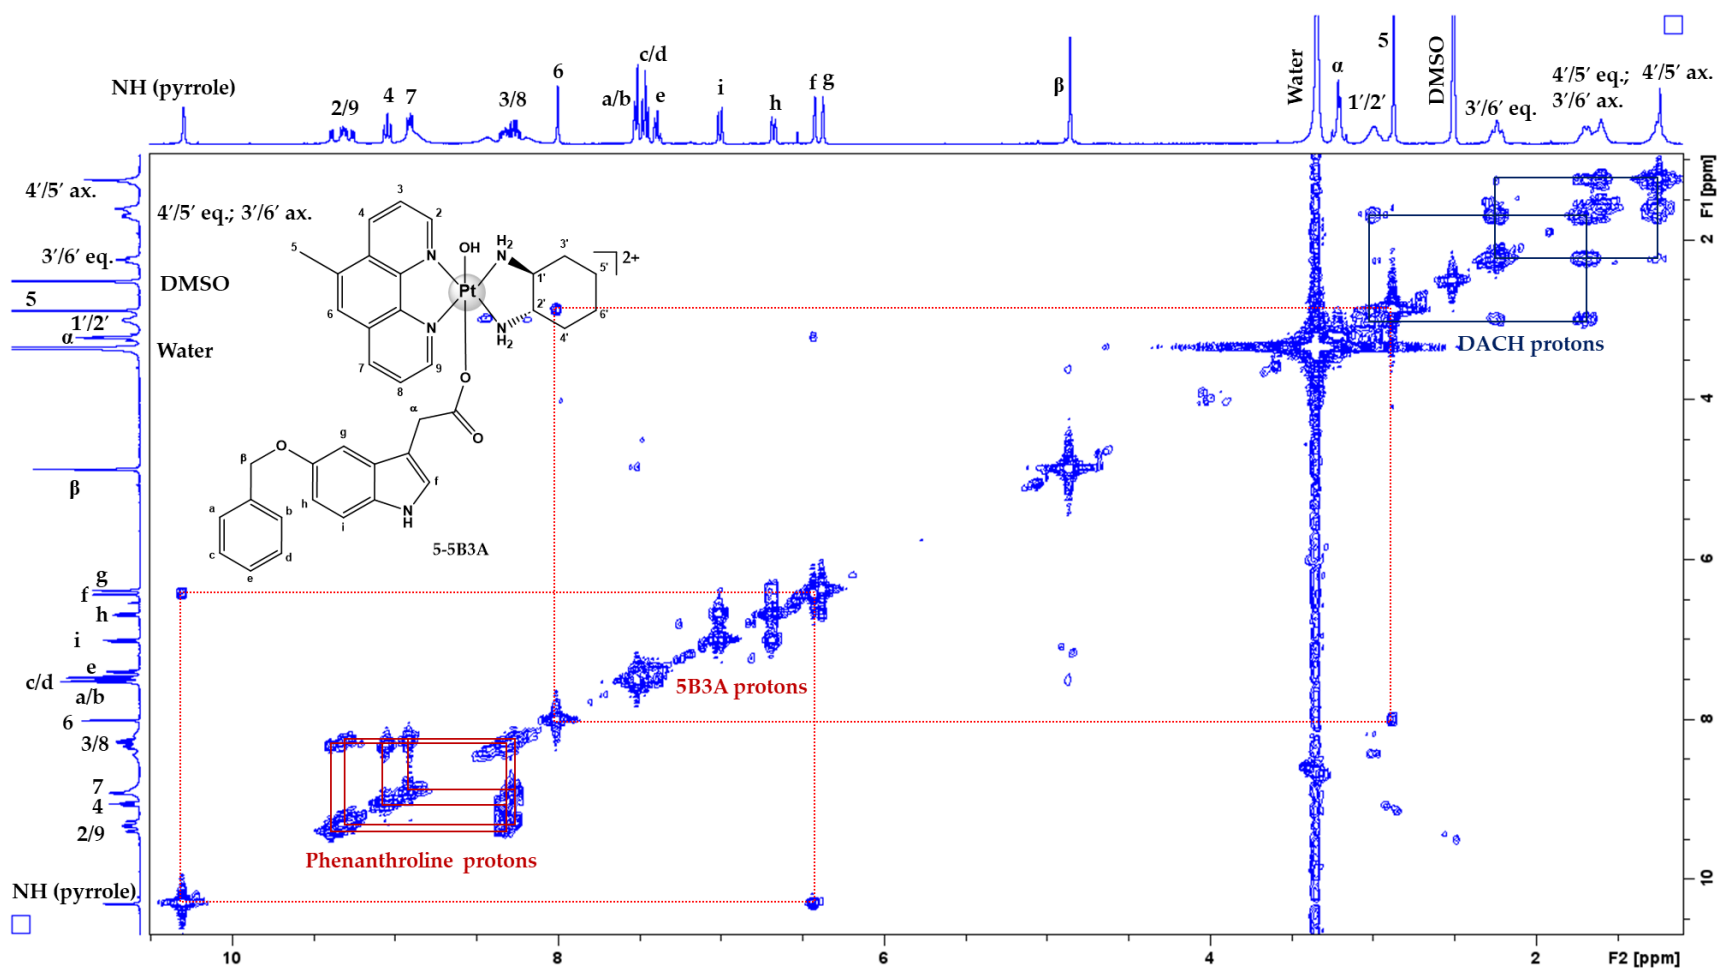

**Figure S13:** 2D-COSY spectrum of 5-5B3A in DMSO-d<sub>6</sub>.

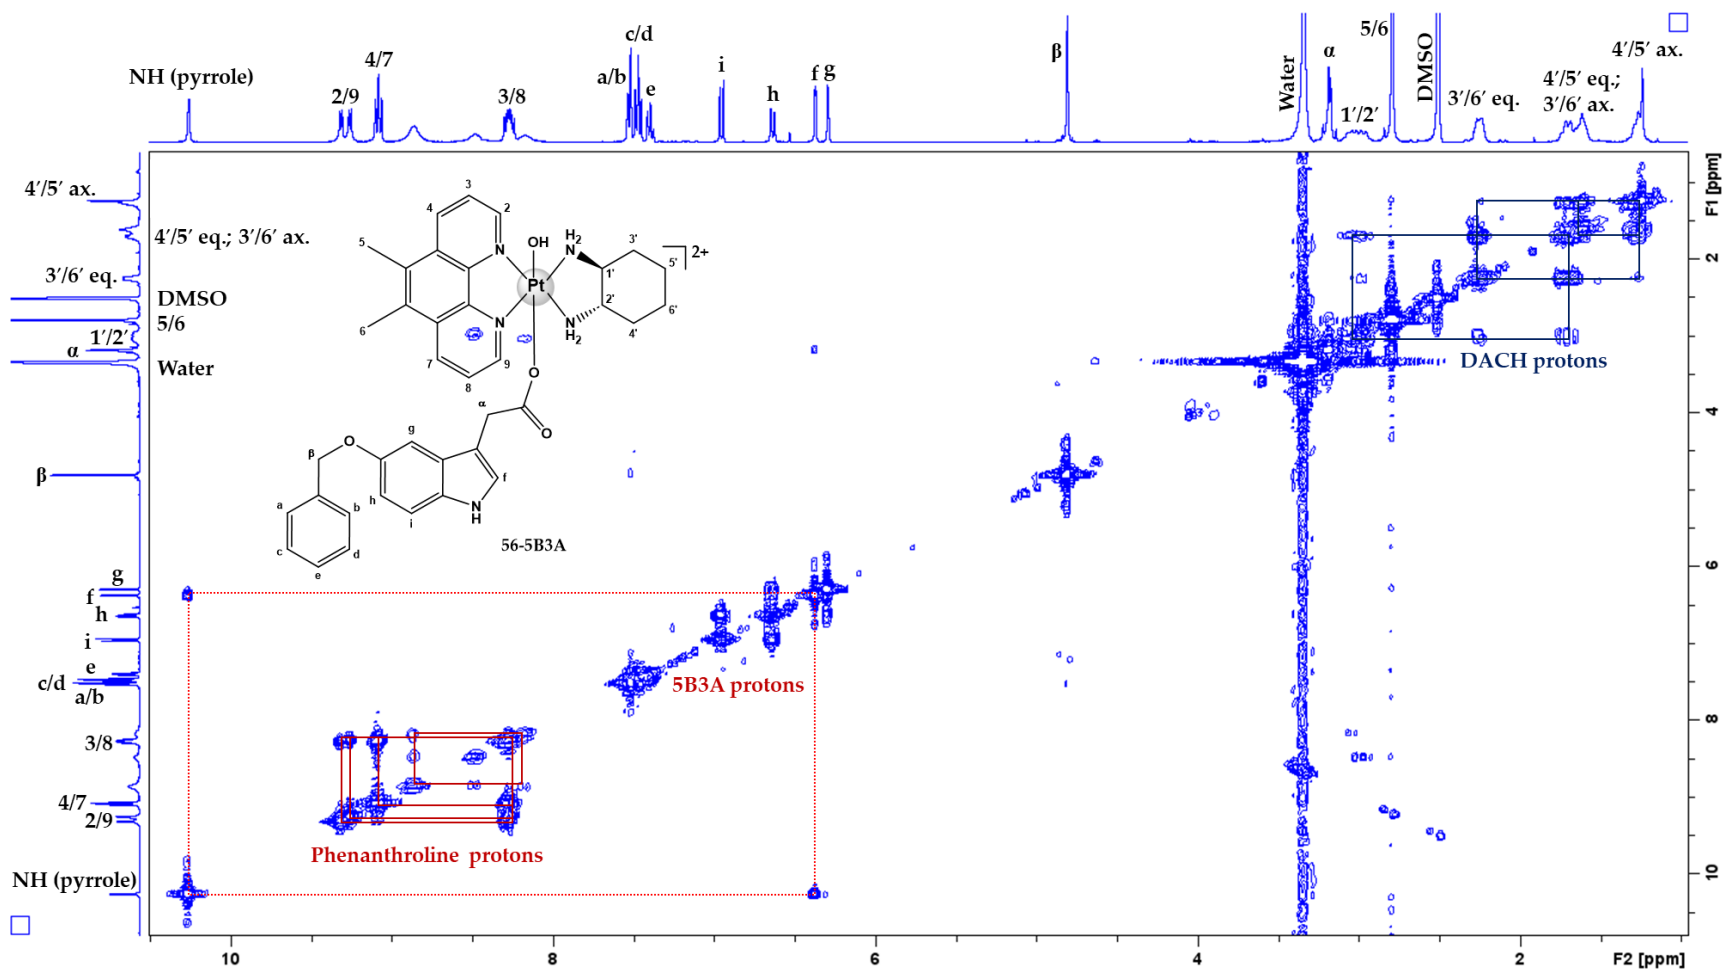

Figure S14: 2D-COSY spectrum of **56-5B3A** in DMSO- $d_6$ .

# $^1\text{H}$ - $^{195}\text{Pt}$ -HMQC Spectra of P-5B3A, 5-5B3A and 56-5B3A

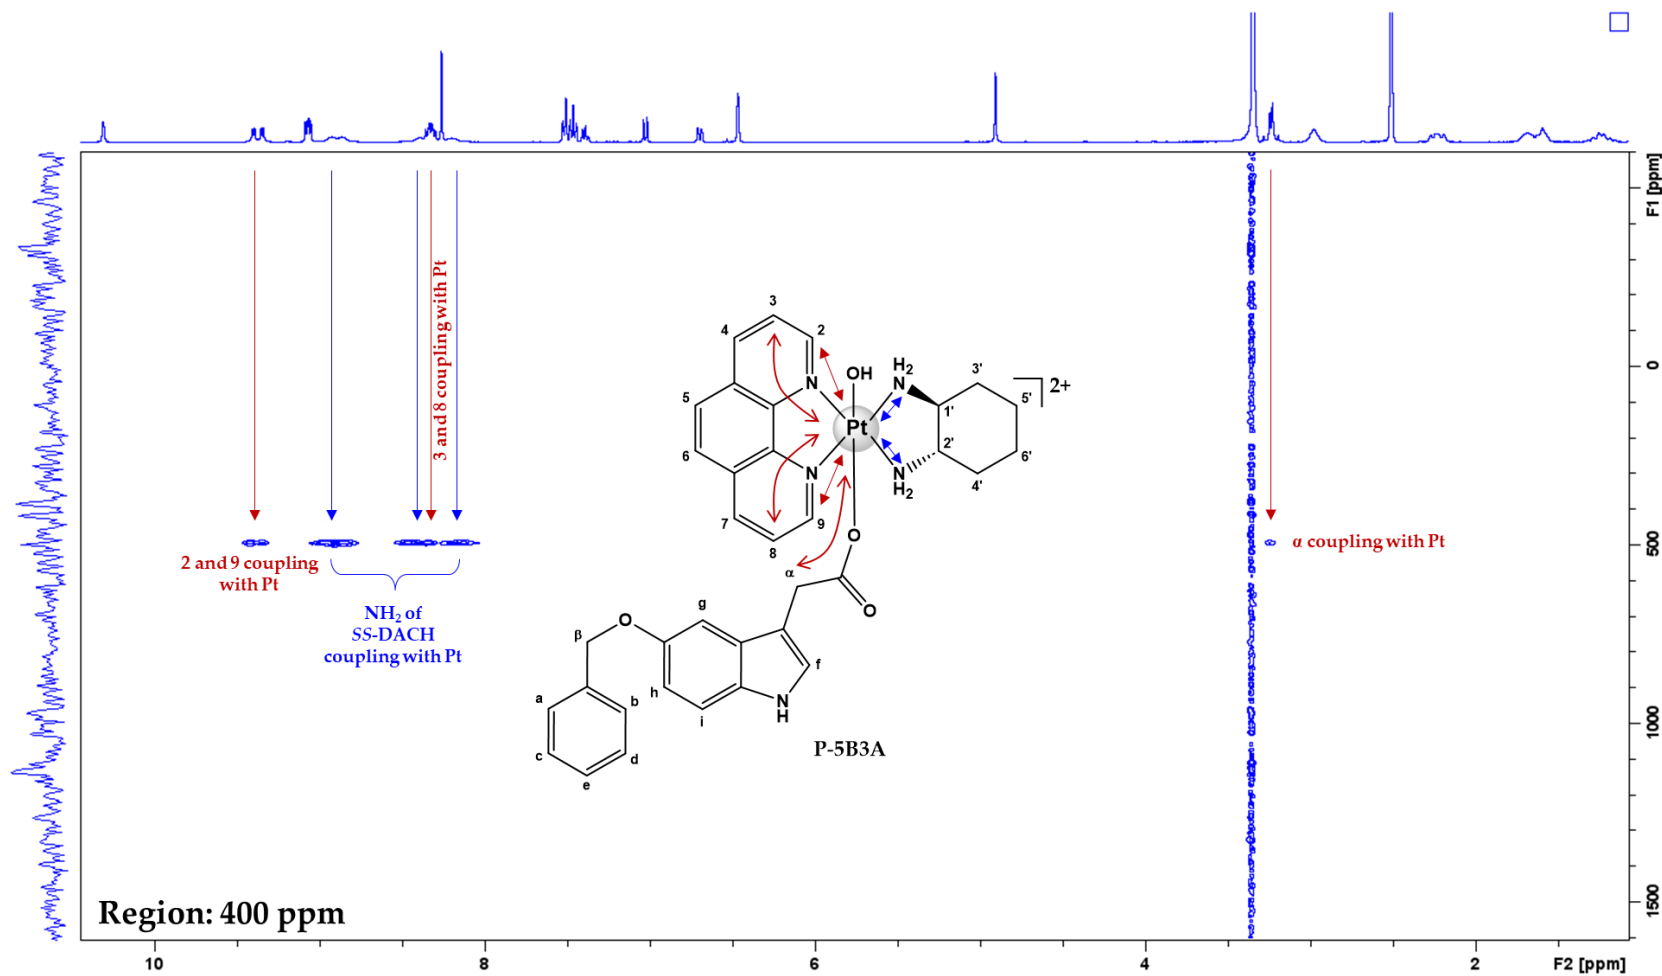

**Figure S15:**  $^1\text{H}$ - $^{195}\text{Pt}$ -HMQC spectrum of **P-5B3A** in DMSO- $d_6$  at 400 ppm.

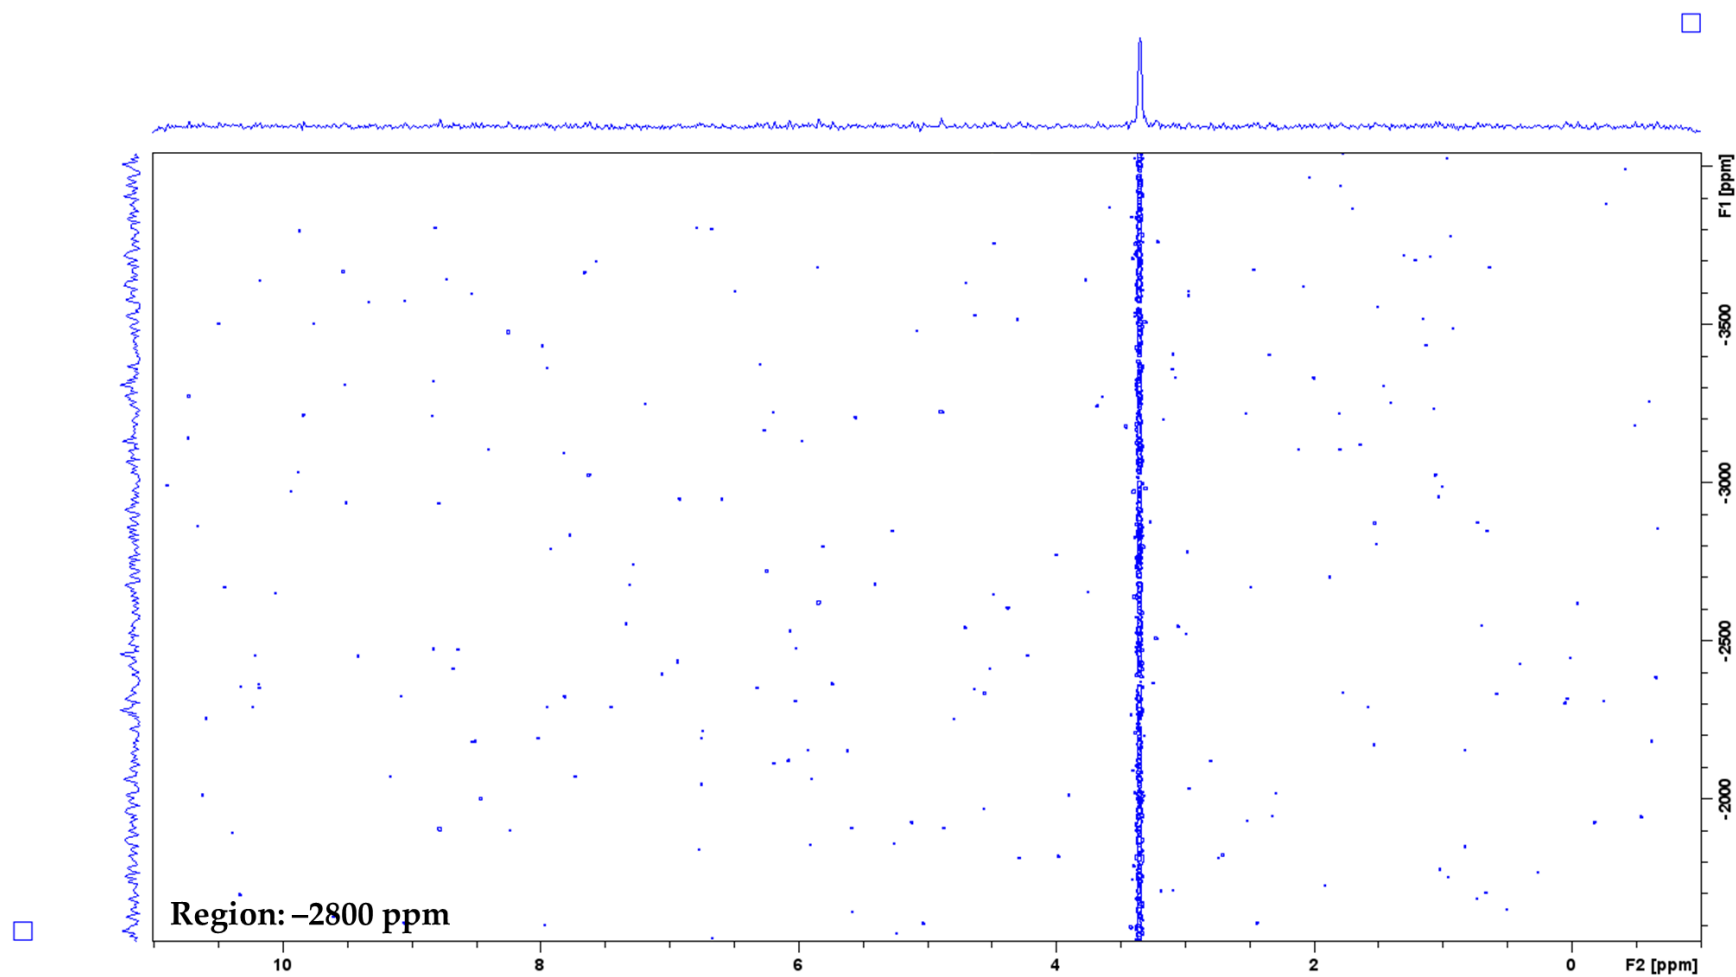

**Figure S16:**  $^1\text{H}$ - $^{195}\text{Pt}$ -HMQC spectrum of **P-5B3A** in  $\text{DMSO-d}_6$  at -2800 ppm.

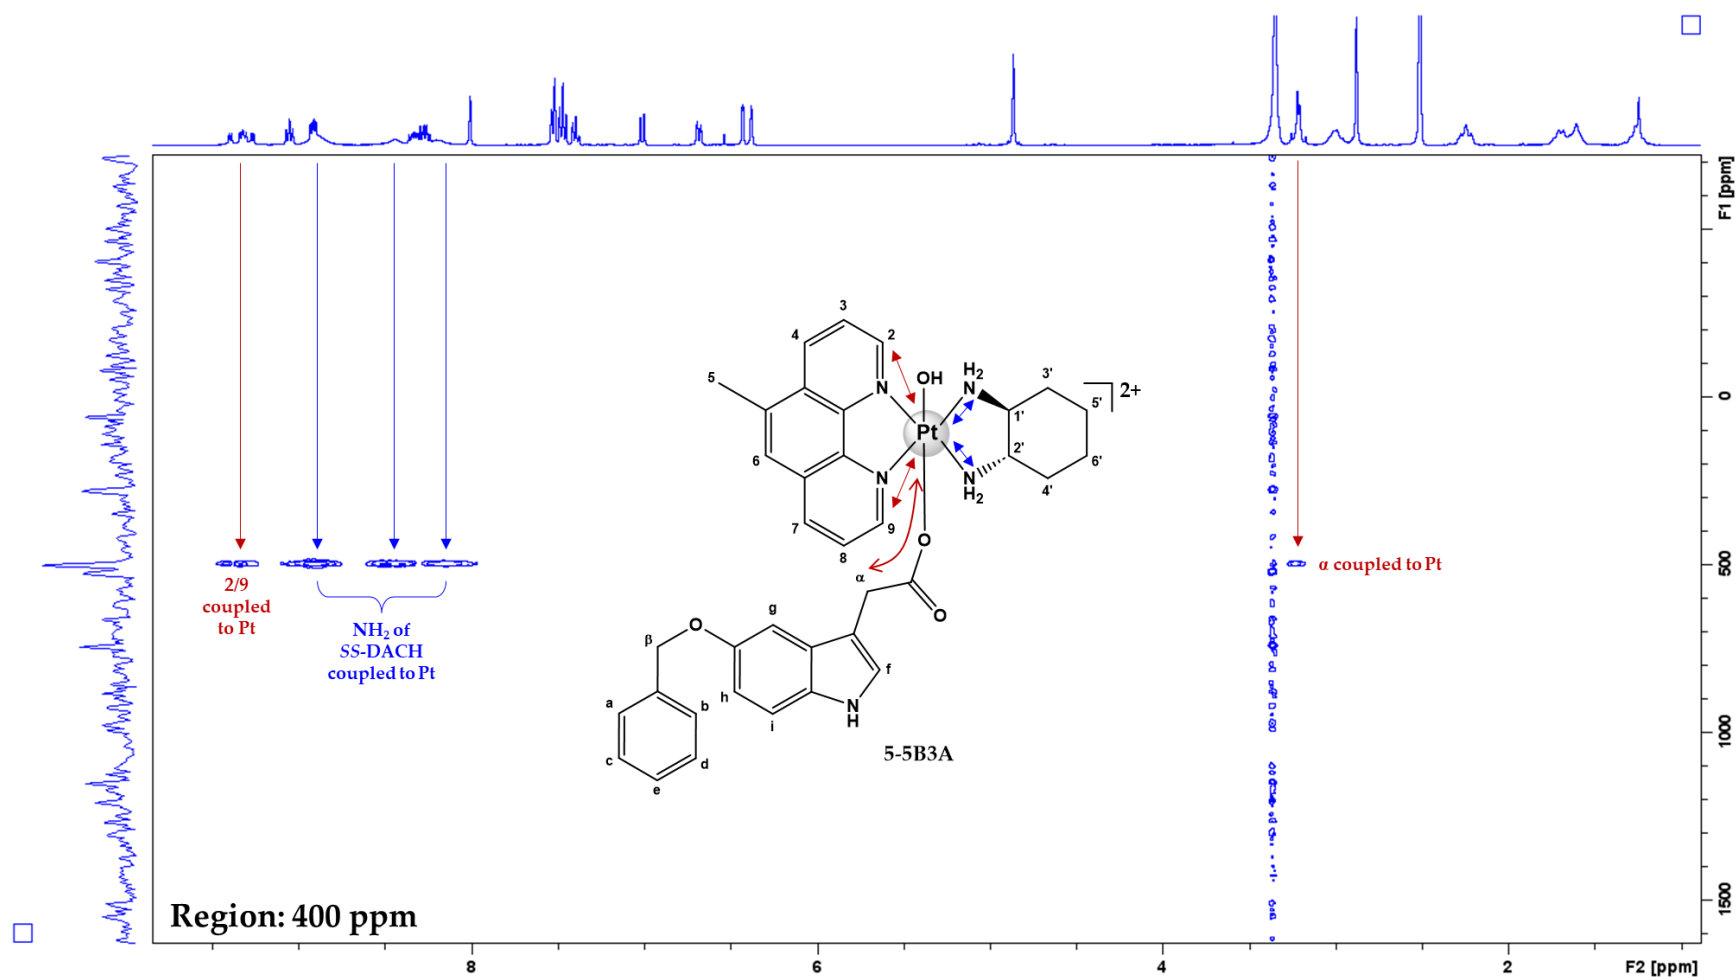

**Figure S17:**  $^1\text{H}$ - $^{195}\text{Pt}$ -HMQC spectrum of **5-5B3A** in DMSO- $\text{d}_6$  at 400 ppm.

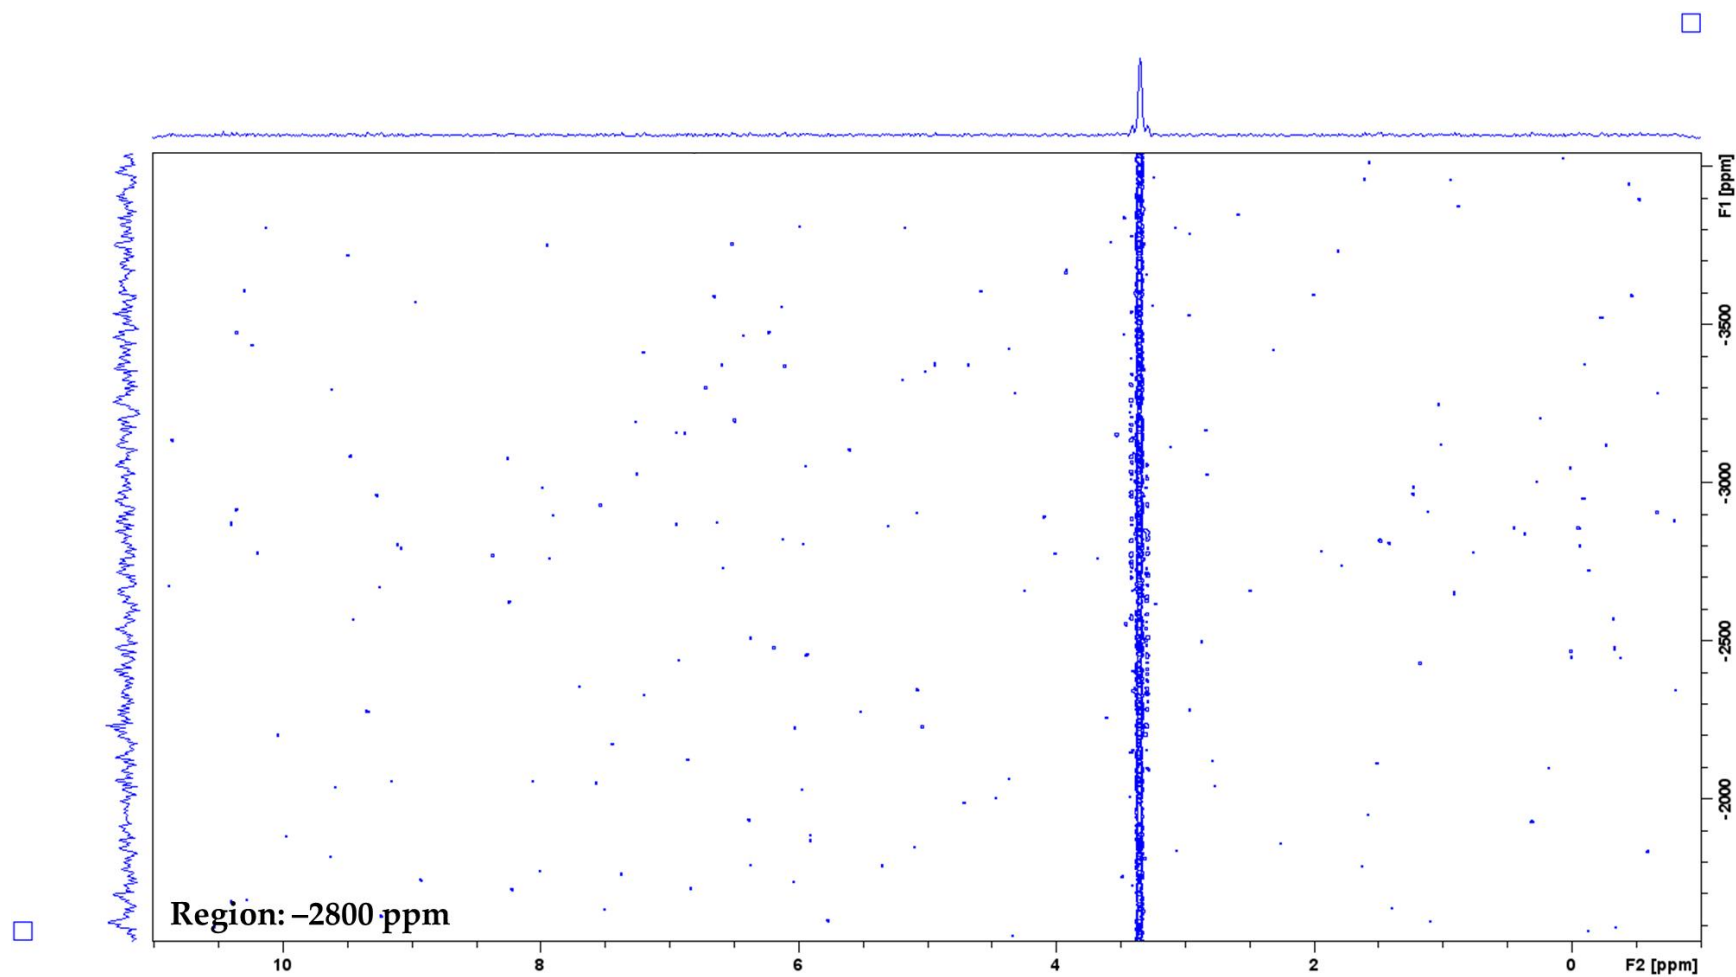

**Figure S18:**  $^1\text{H}$ - $^{195}\text{Pt}$ -HMQC spectrum of **5-5B3A** in DMSO- $\text{d}_6$  at -2800 ppm.

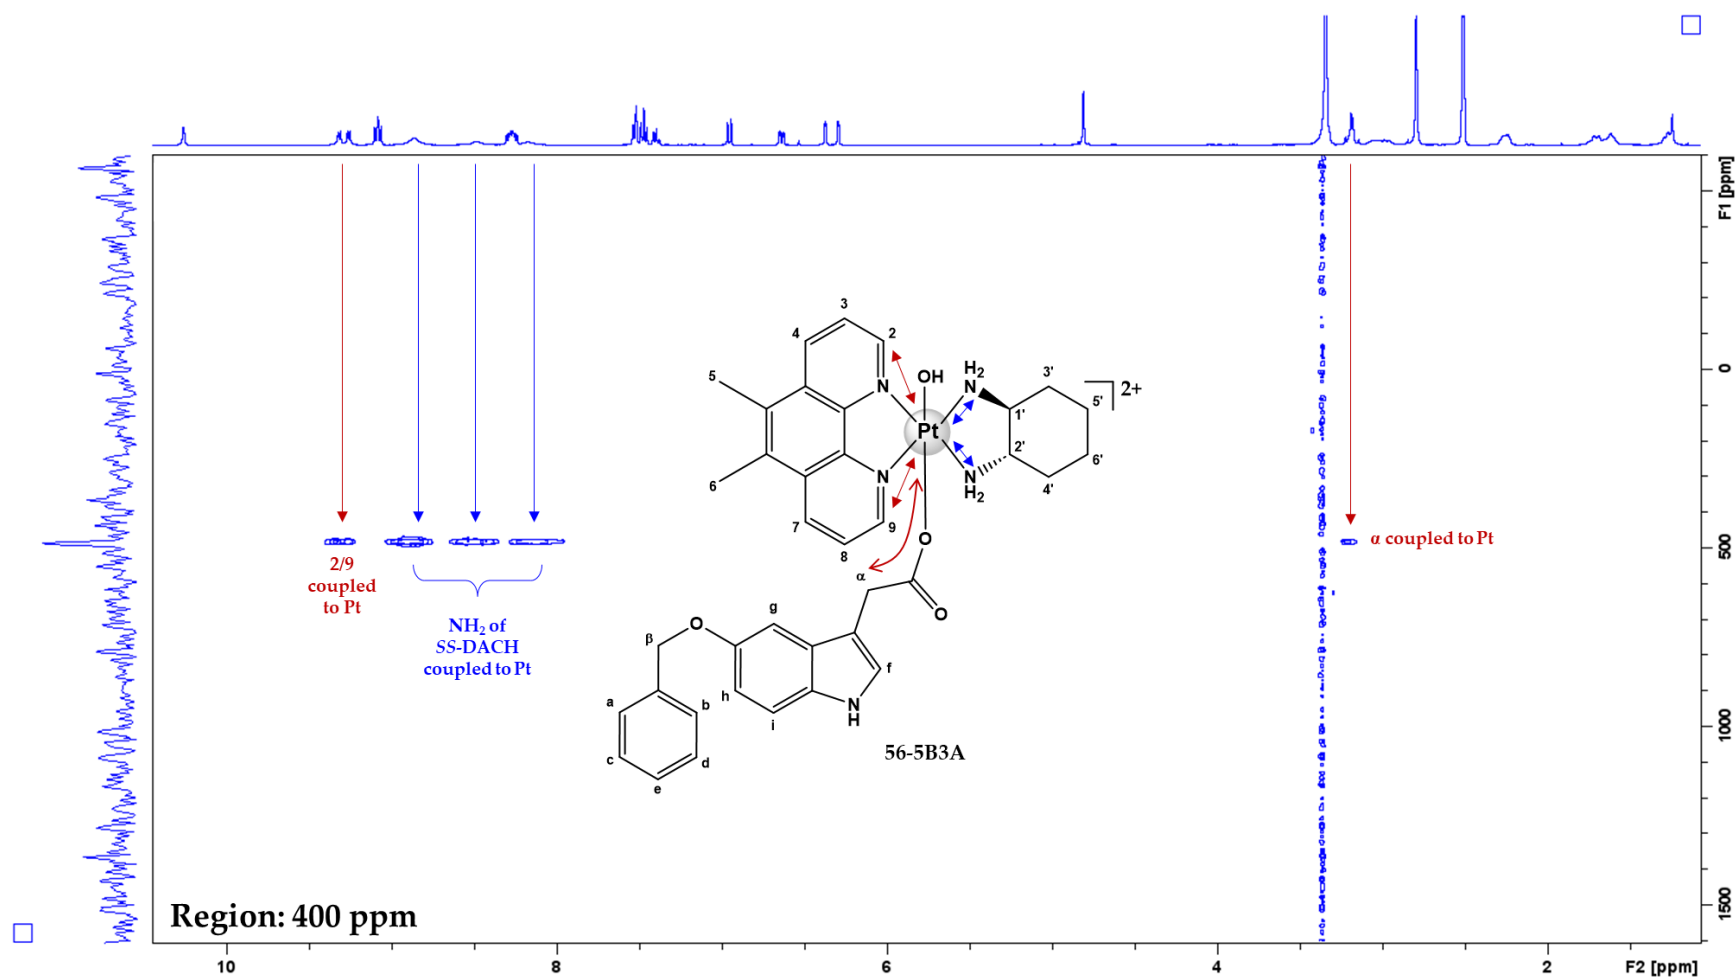

**Figure S19:**  $^1\text{H}$ - $^{195}\text{Pt}$ -HMQC spectrum of **56-5B3A** in DMSO- $\text{d}_6$  at 400 ppm.

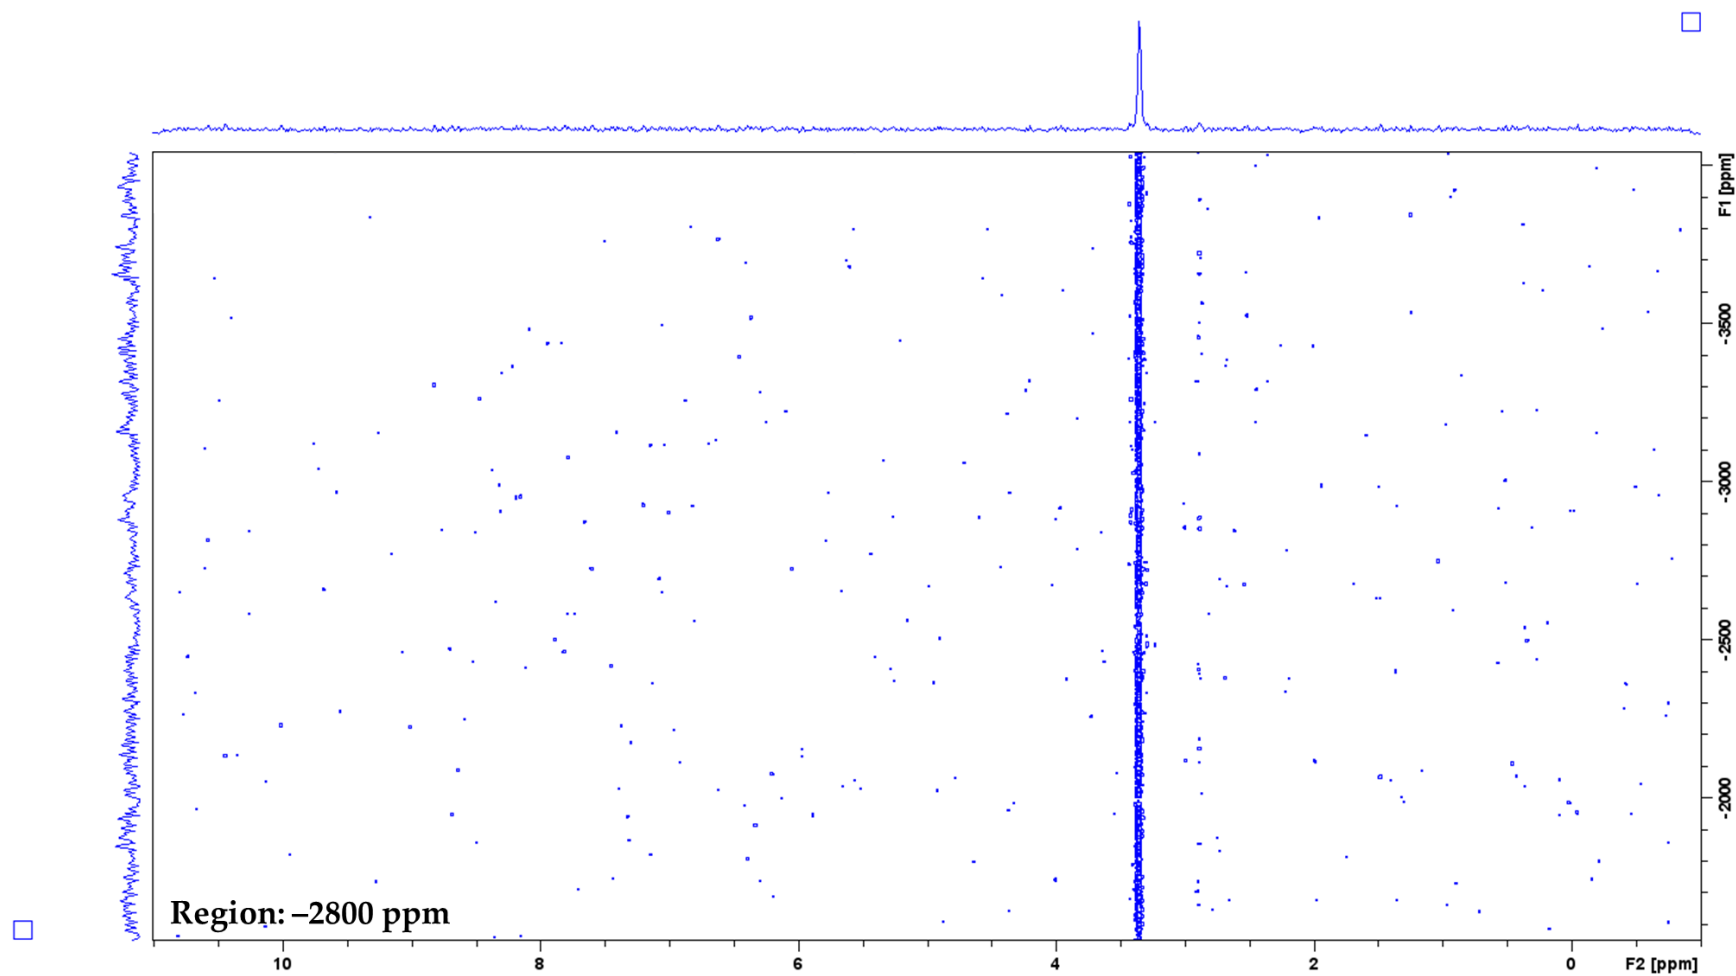

**Figure S20:**  $^1\text{H}$ - $^{195}\text{Pt}$ -HMQC spectrum of **56-5B3A** in  $\text{DMSO-d}_6$  at -2800 ppm.

# UV Spectra of P-5B3A, 5-5B3A and 56-5B3A

UV absorption spectra of platinum(IV) complex, P-5B3A

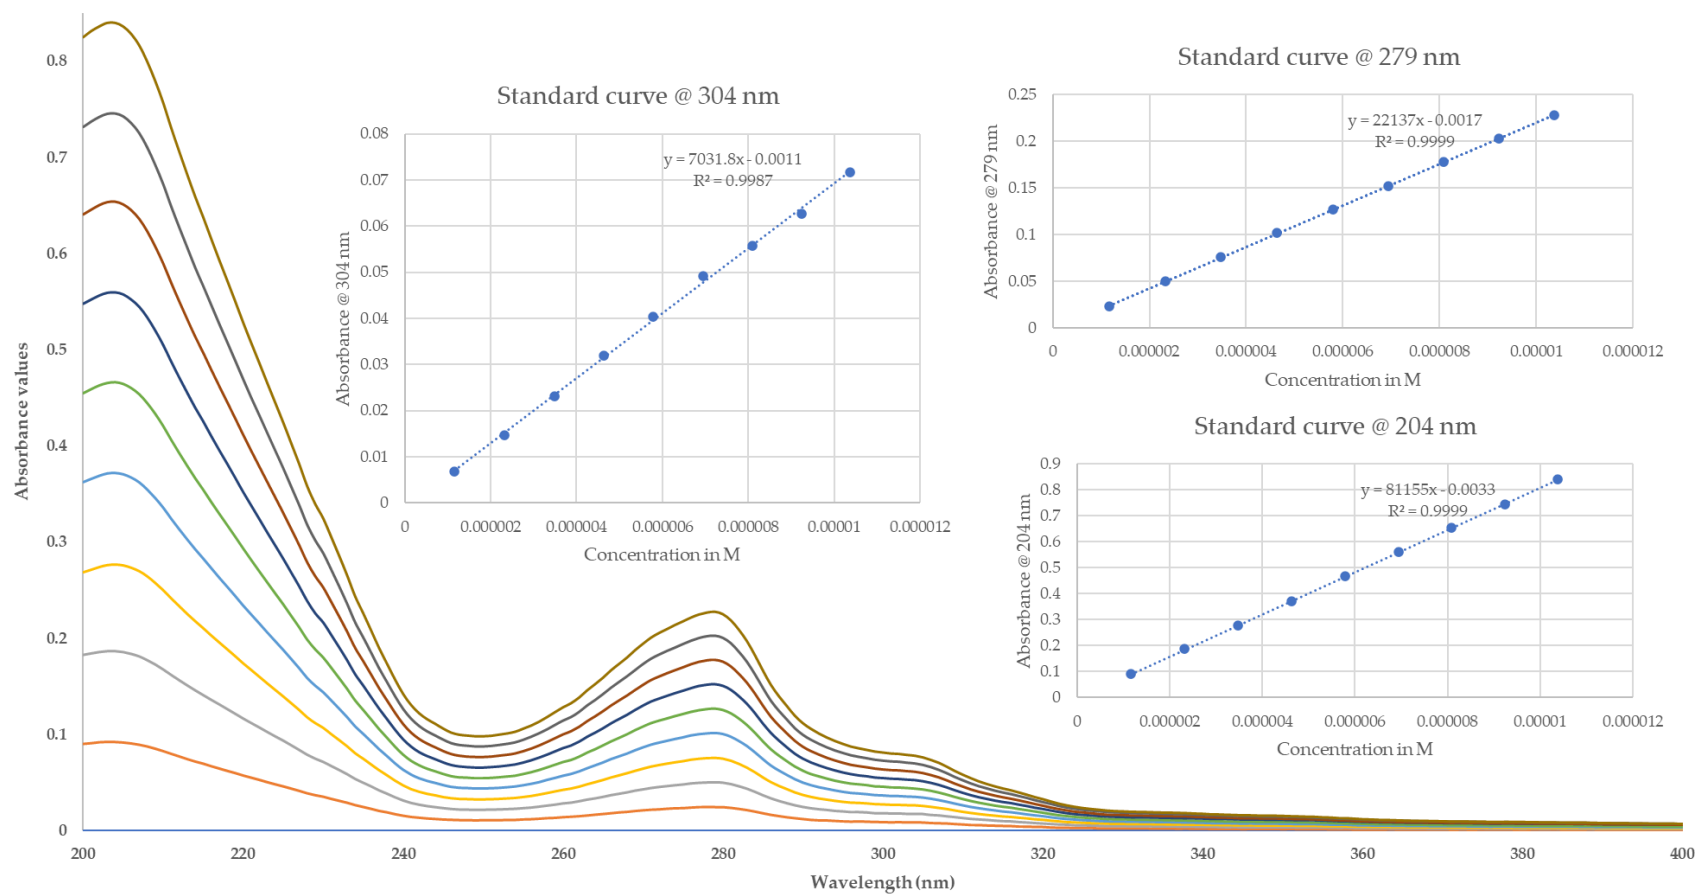

**Figure S21:** UV spectra of **P-5B3A** and plot curves at 204, 279 and 304 nm.

### UV absorption spectra of platinum(IV) complex, 5-5B3A

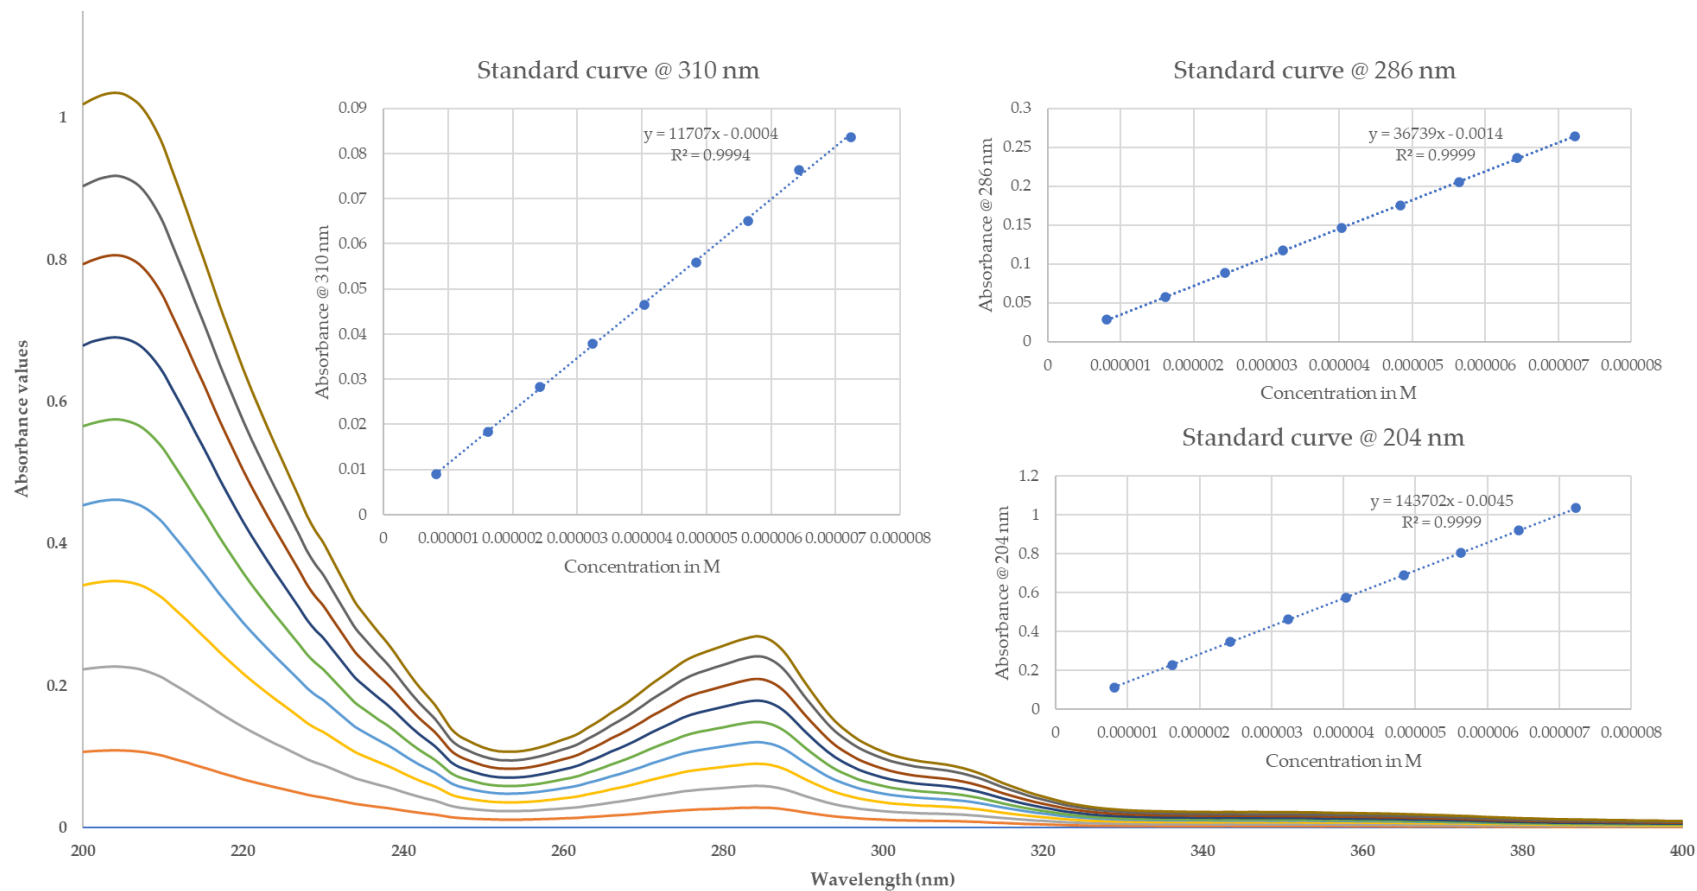

**Figure S22:** UV spectra of **5-5B3A** and plot curves at 204, 286 and 310 nm.

### UV absorption spectra of platinum(IV) complex, 56-5B3A

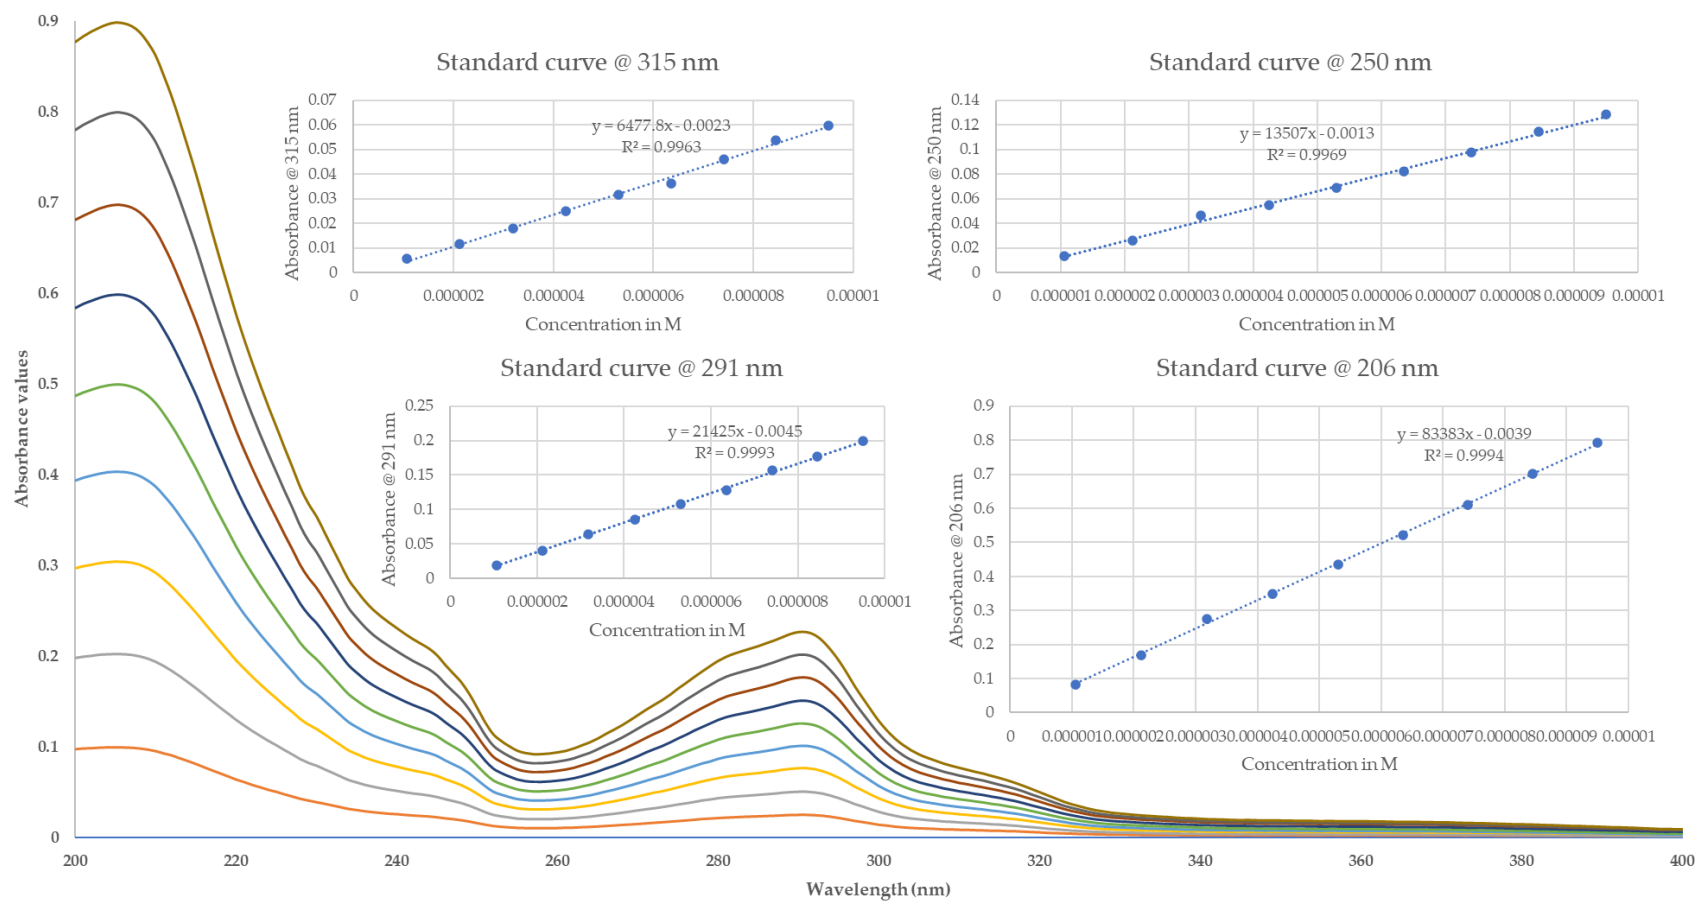

**Figure S23:** UV spectra of **56-5B3A** and plot curves at 206, 250, 291 and 315 nm.

## CD Spectra of P-5B3A, 5-5B3A and 56-5B3A

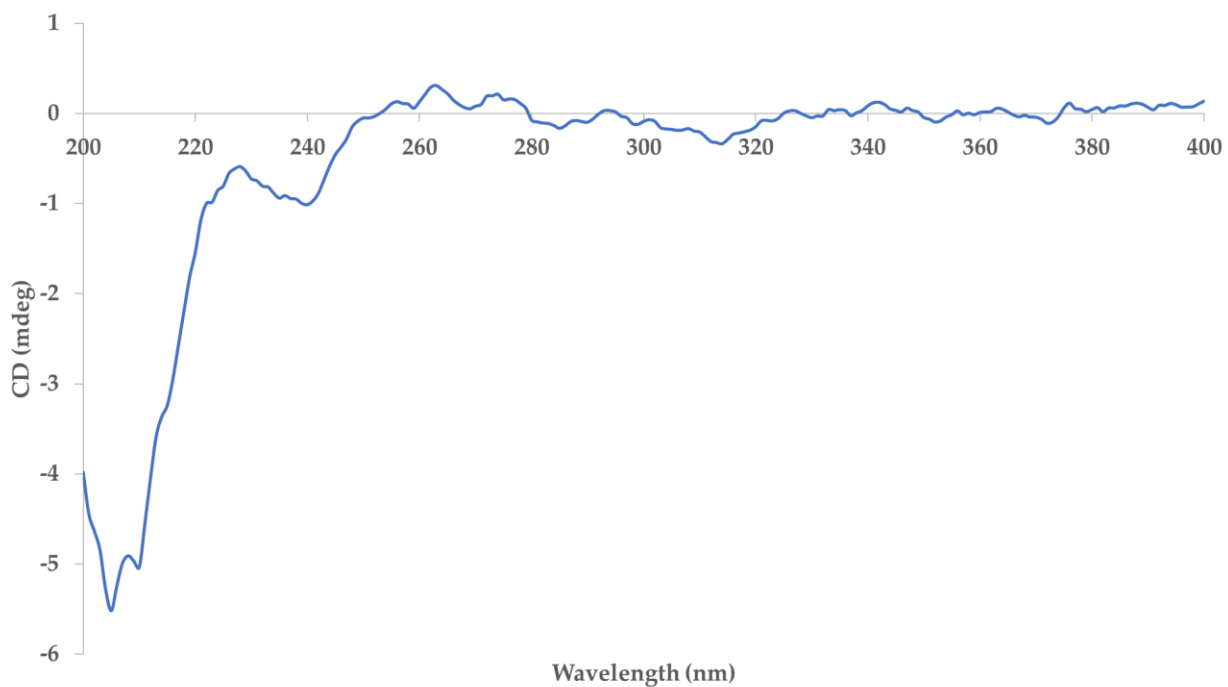

**Figure S24:** CD spectrum of P-5B3A (0.05 mM) acquired after 30 accumulations.

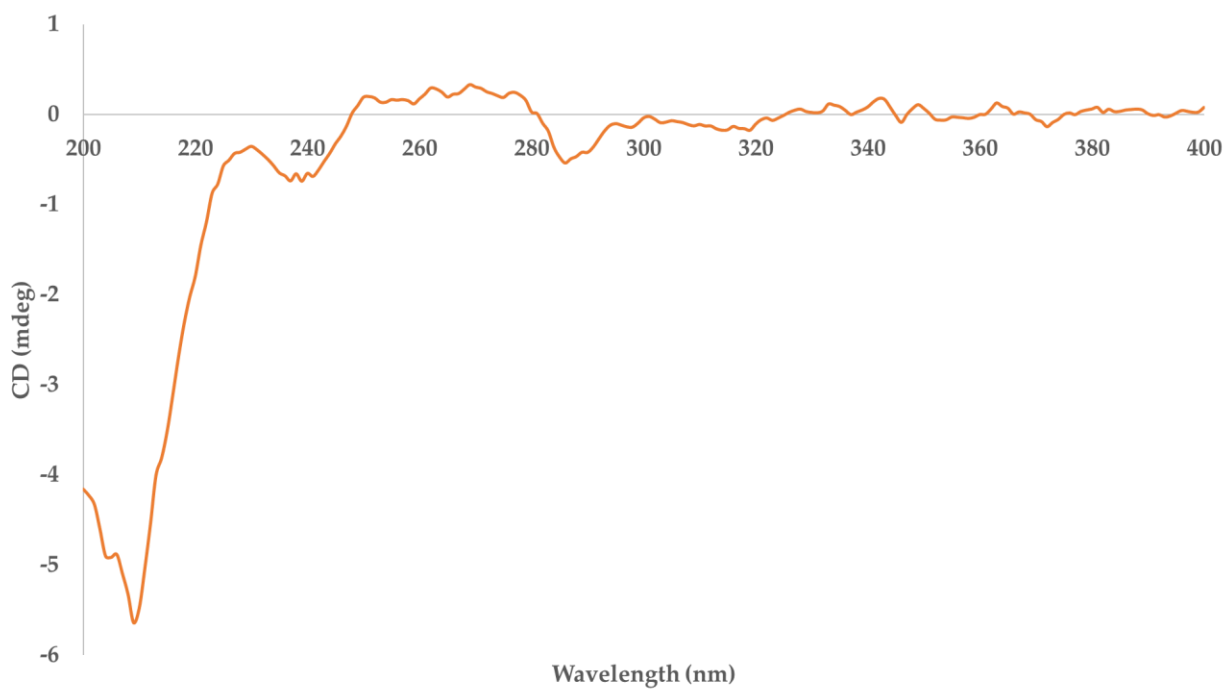

**Figure S25:** CD spectrum of 5-5B3A (0.05 mM) acquired after 30 accumulations.

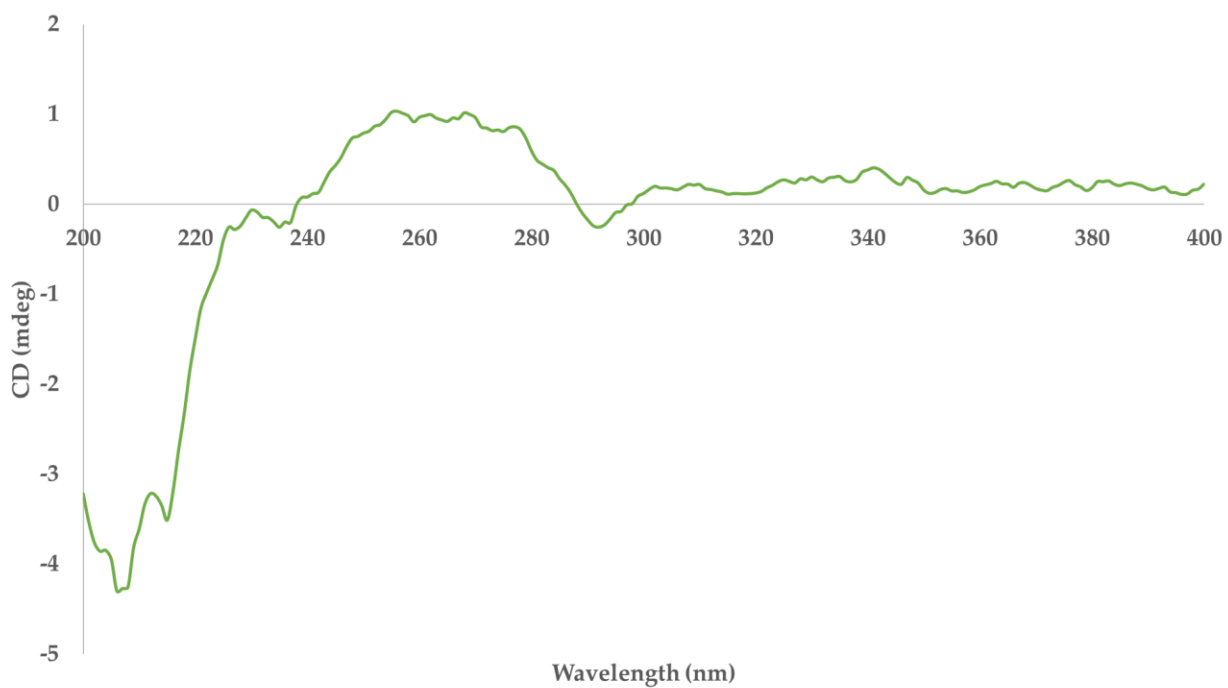

**Figure S26:** CD spectrum of **56-5B3A** (0.05 mM) acquired after 30 accumulations.

## Lipophilicity Measurements

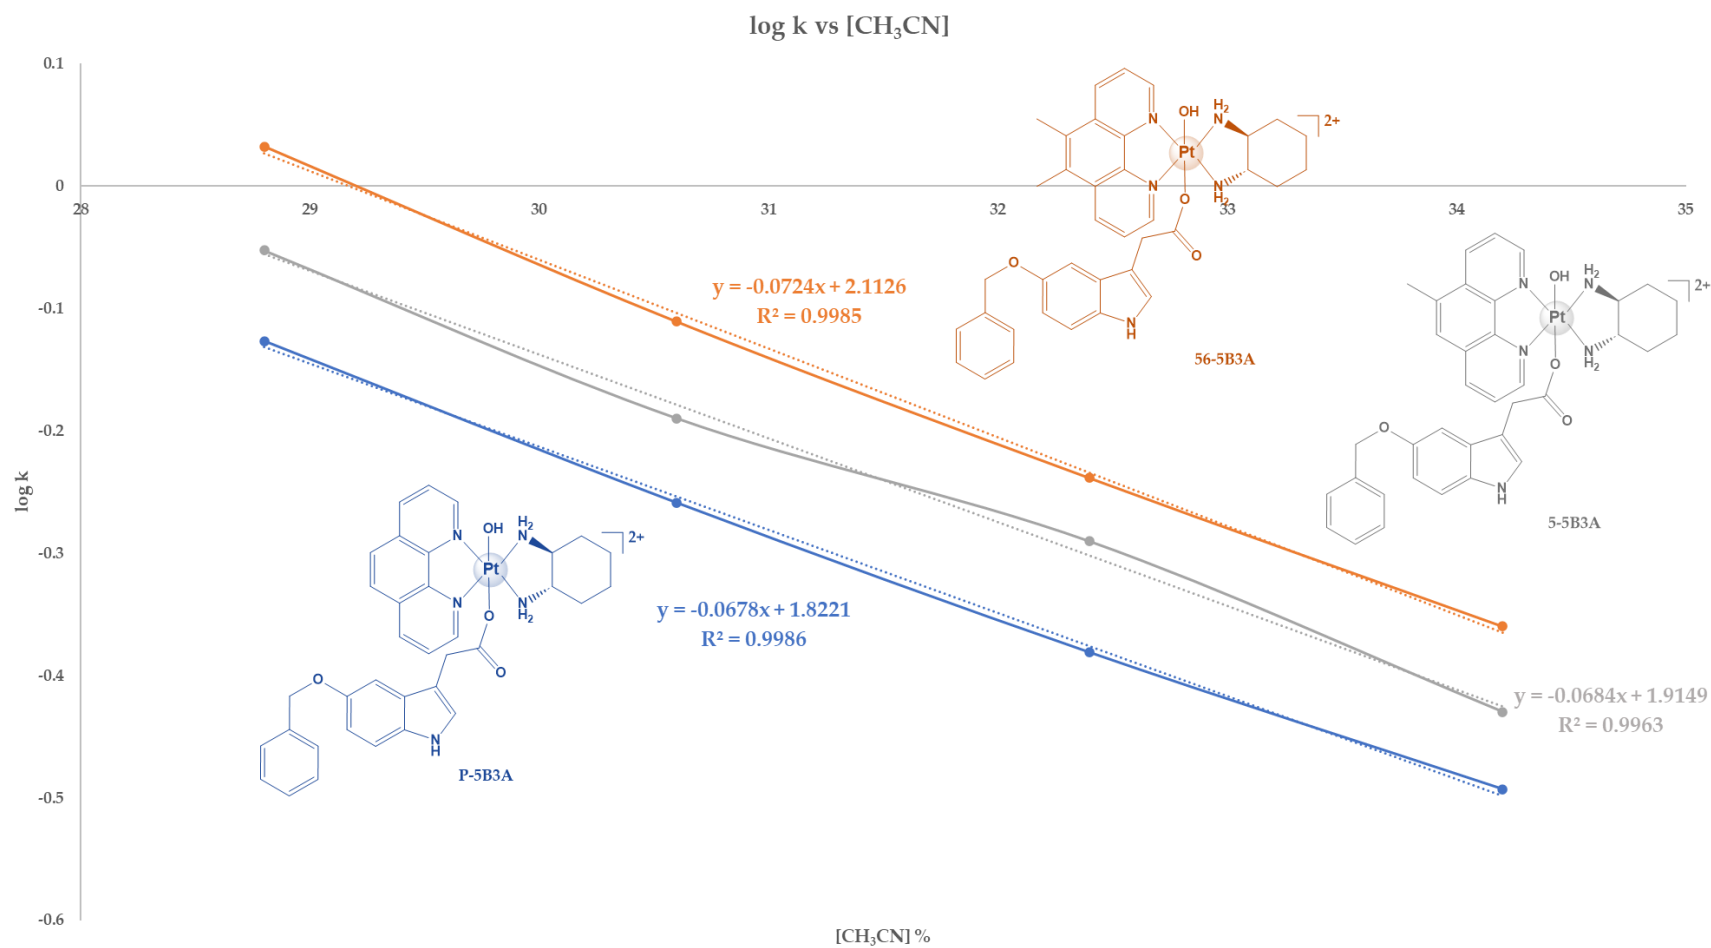

**Figure S27:** Plots of log k versus concentration of the organic solvent, CH<sub>3</sub>CN to determine the chromatographic lipophilicity index, log k<sub>w</sub> of **P-5B3A**, **5-5B3A** and **56-5B3A**.

## Reduction Measurements for P-5B3A, 5-5B3A and 56-5B3A

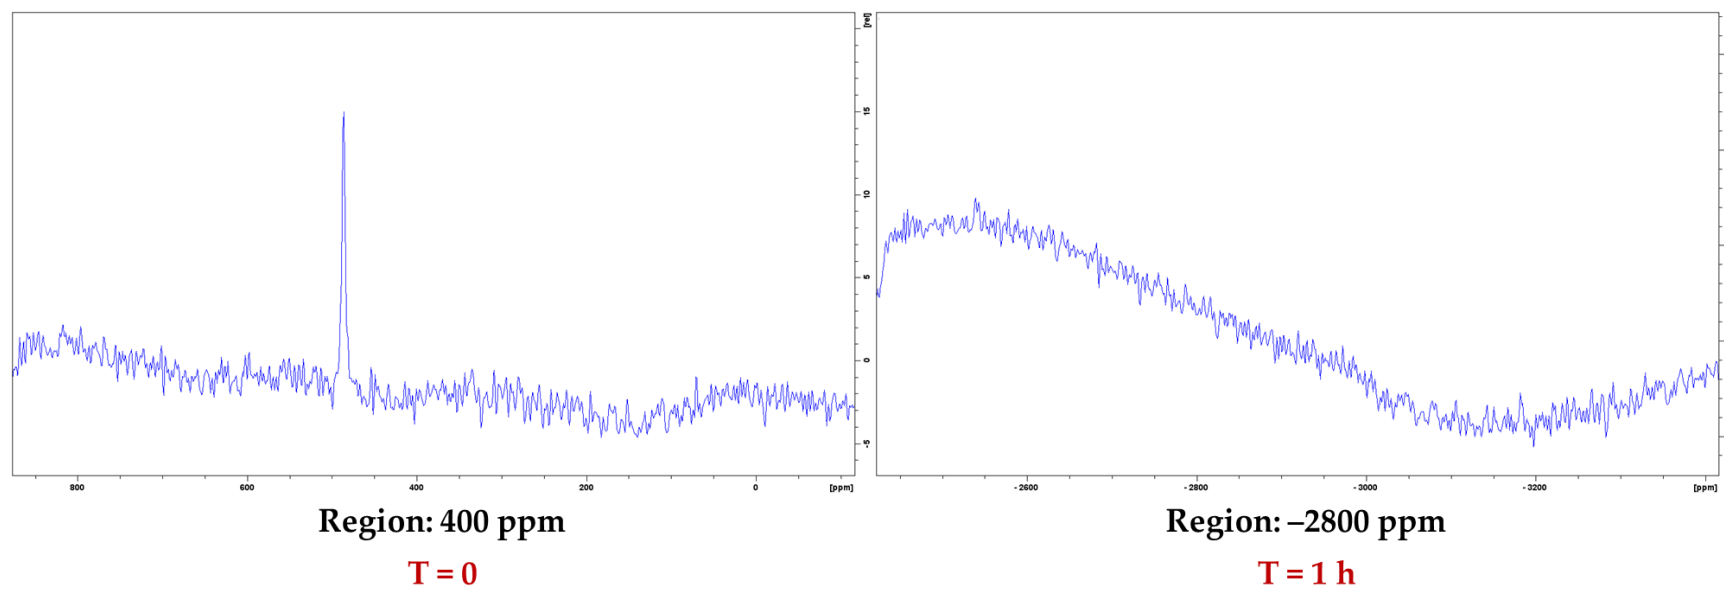

**Figure S28:** Preliminary 1D- $^{195}\text{Pt}$ -NMR spectra of **P-5B3A** with PBS in DMSO- $d_6$  within the regions of 400 and -2800 ppm and at 37 °C.

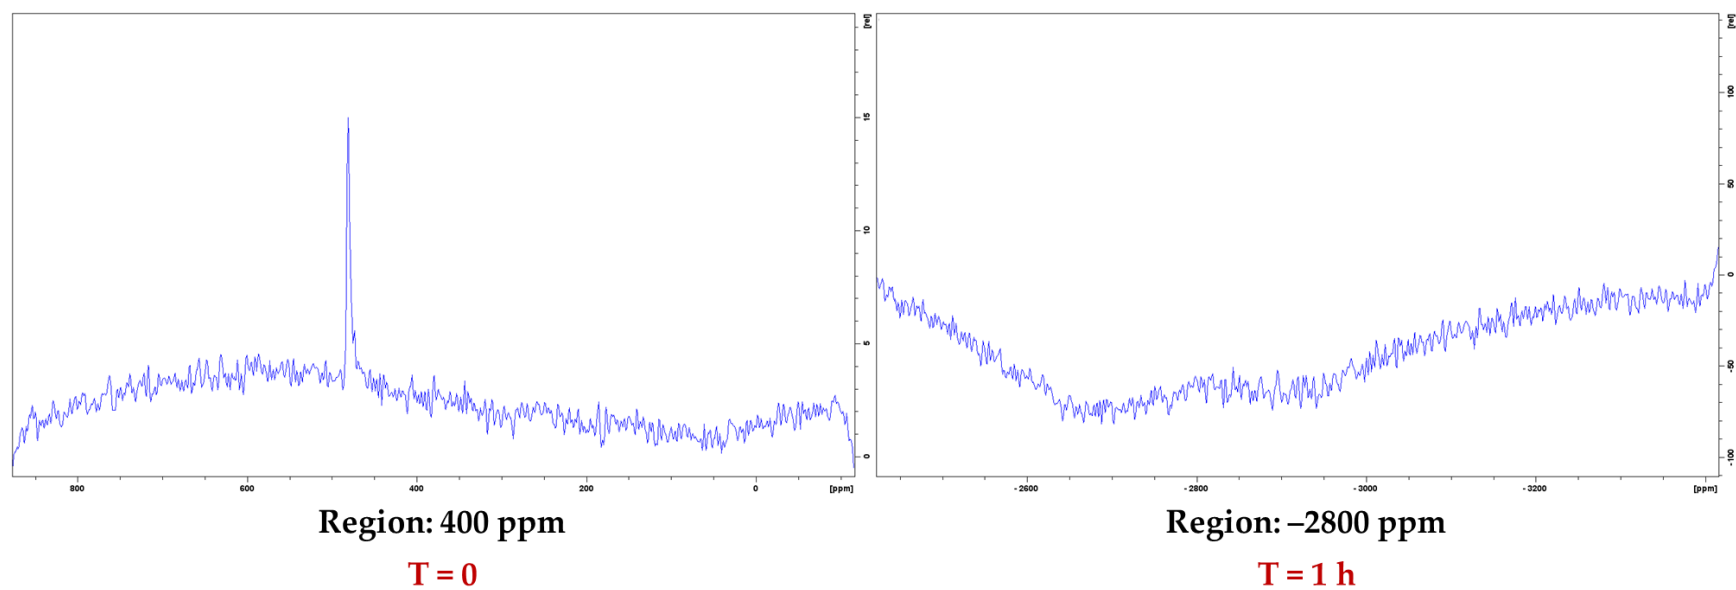

**Figure S29:** Preliminary 1D- $^{195}\text{Pt}$ -NMR spectra of **5-5B3A** with PBS in DMSO- $\text{d}_6$  within the regions of 400 and -2800 ppm and at 37 °C.

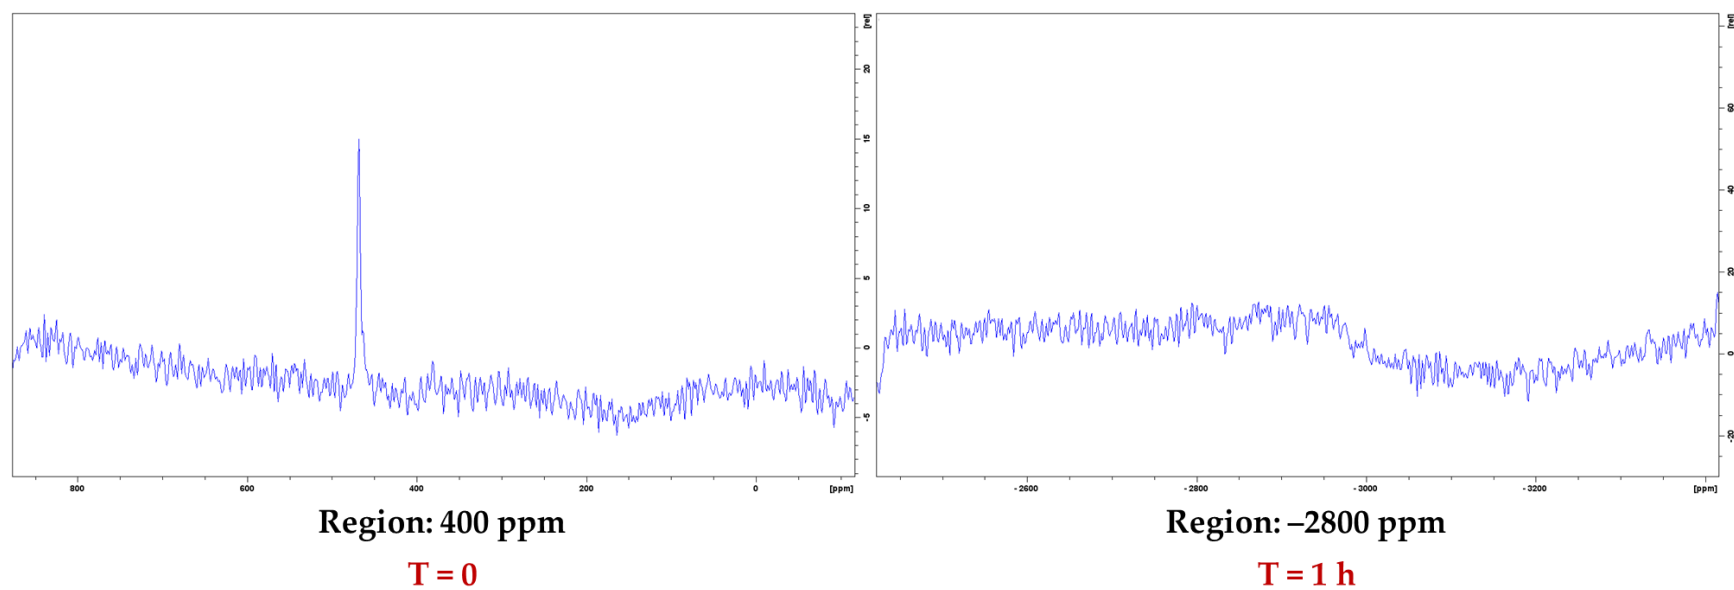

**Figure S30:** Preliminary 1D-<sup>195</sup>Pt-NMR spectra of **56-5B3A** with PBS in DMSO-d<sub>6</sub> within the regions of 400 and -2800 ppm and at 37 °C.

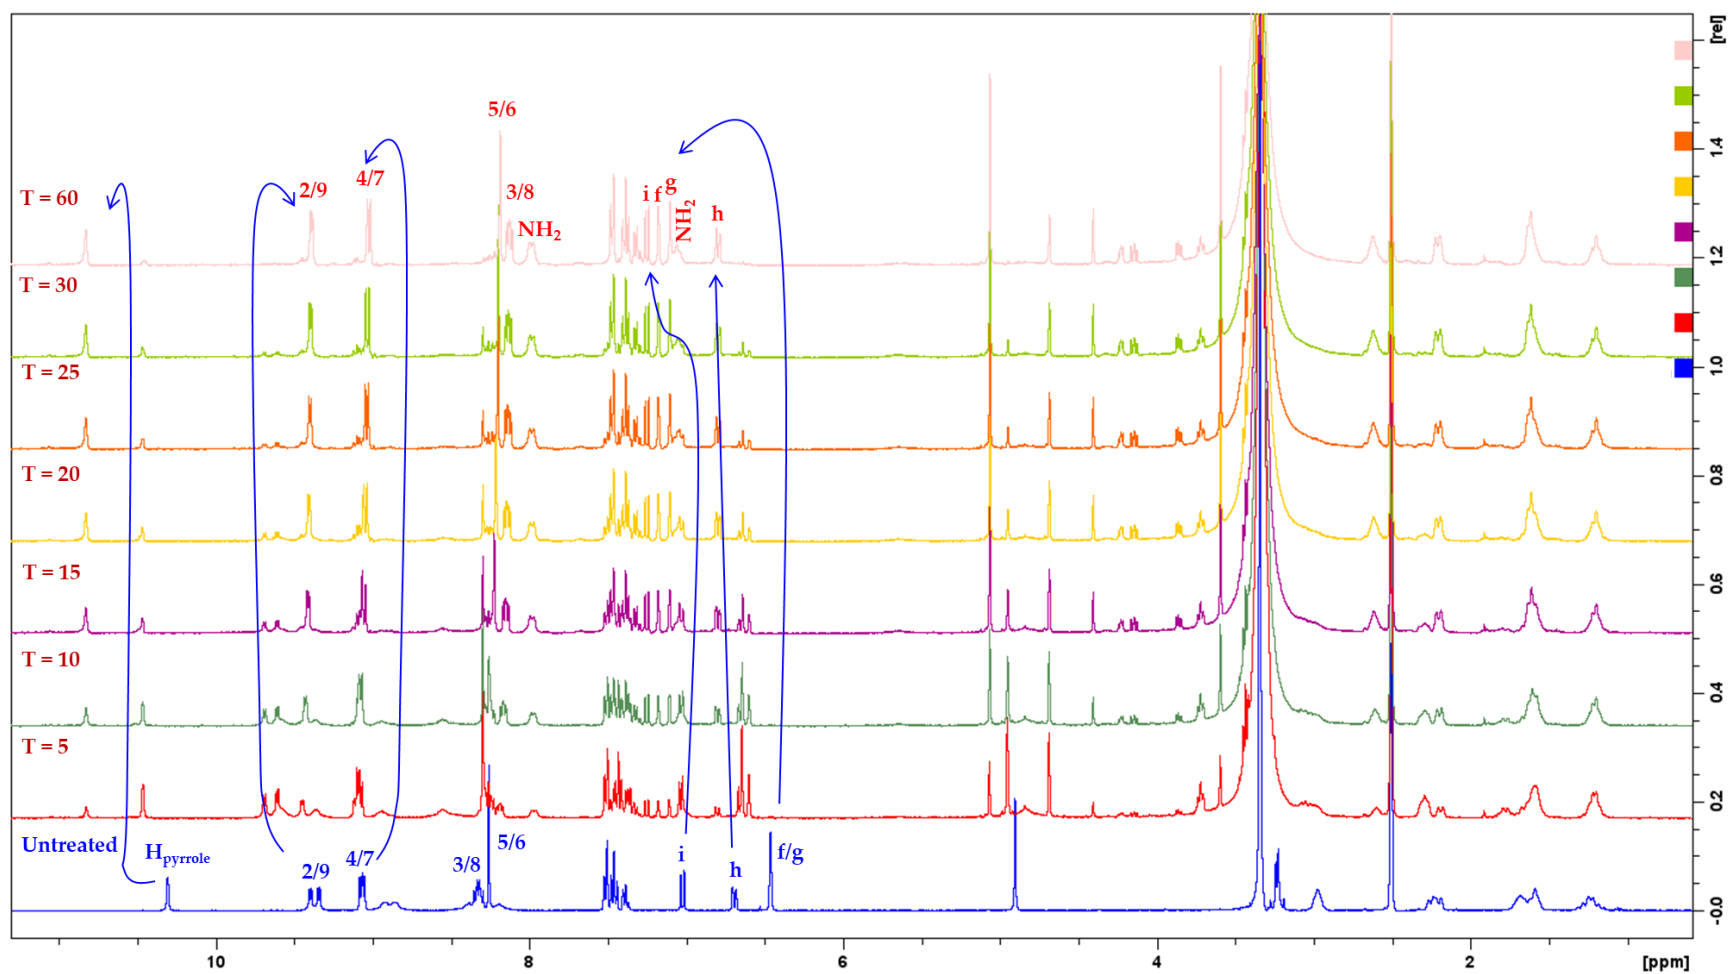

**Figure S31:**  $^1\text{H}$ -NMR spectra of P-5B3A with PBS and AsA in DMSO- $d_6$  at 37 °C, in different time intervals, displaying the shift in chemical multiplicity. T is time in min.

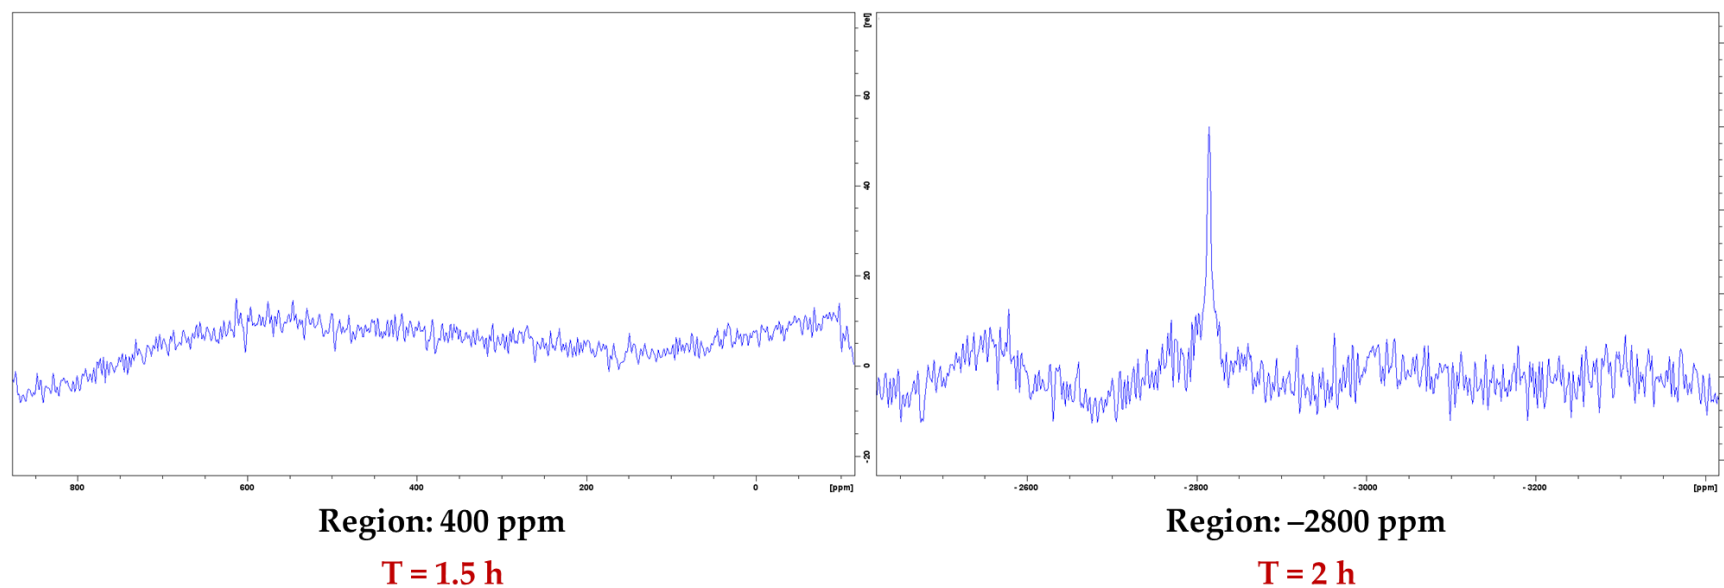

**Figure S32:** 1D- $^{195}\text{Pt}$ -NMR spectra of **P-5B3A** with PBS and AsA in DMSO- $\text{d}_6$ , within the regions of 400 and -2800 ppm at 37 °C, displaying its complete reduction after 2 h from the final  $^1\text{H}$ -NMR experiment.

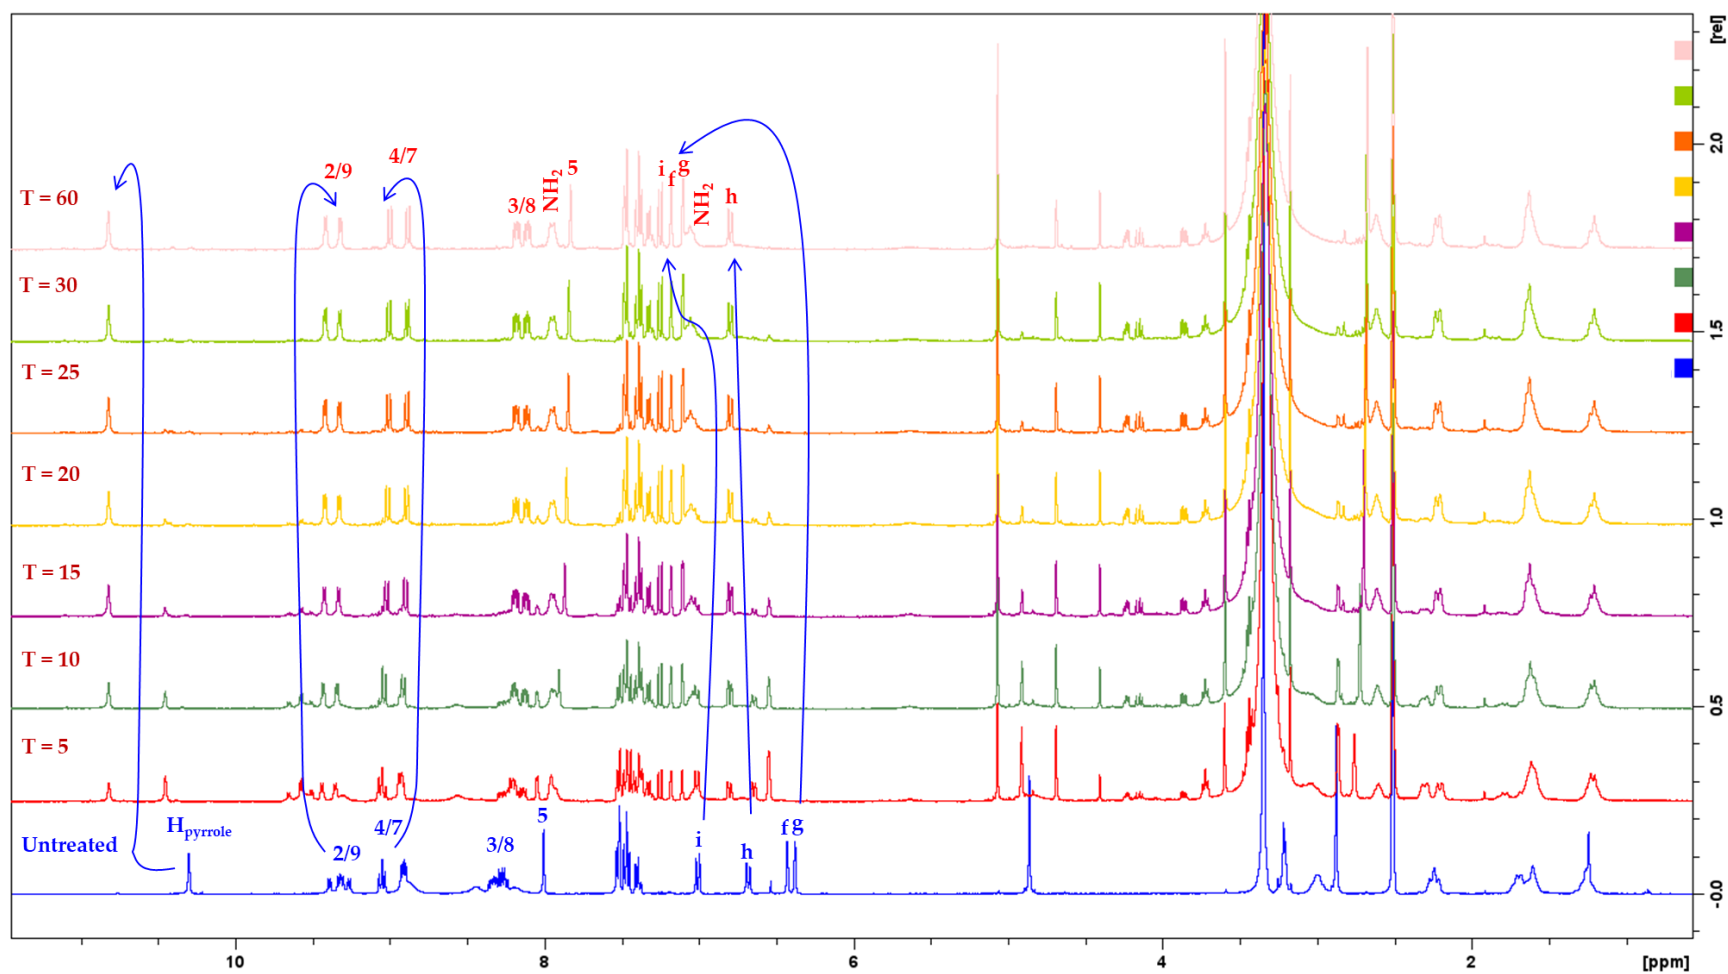

**Figure S33:**  $^1\text{H}$ -NMR spectra of 5-5B3A with PBS and AsA in DMSO- $d_6$  at 37 °C, in different time intervals, displaying the shift in chemical multiplicity. T is time in min.

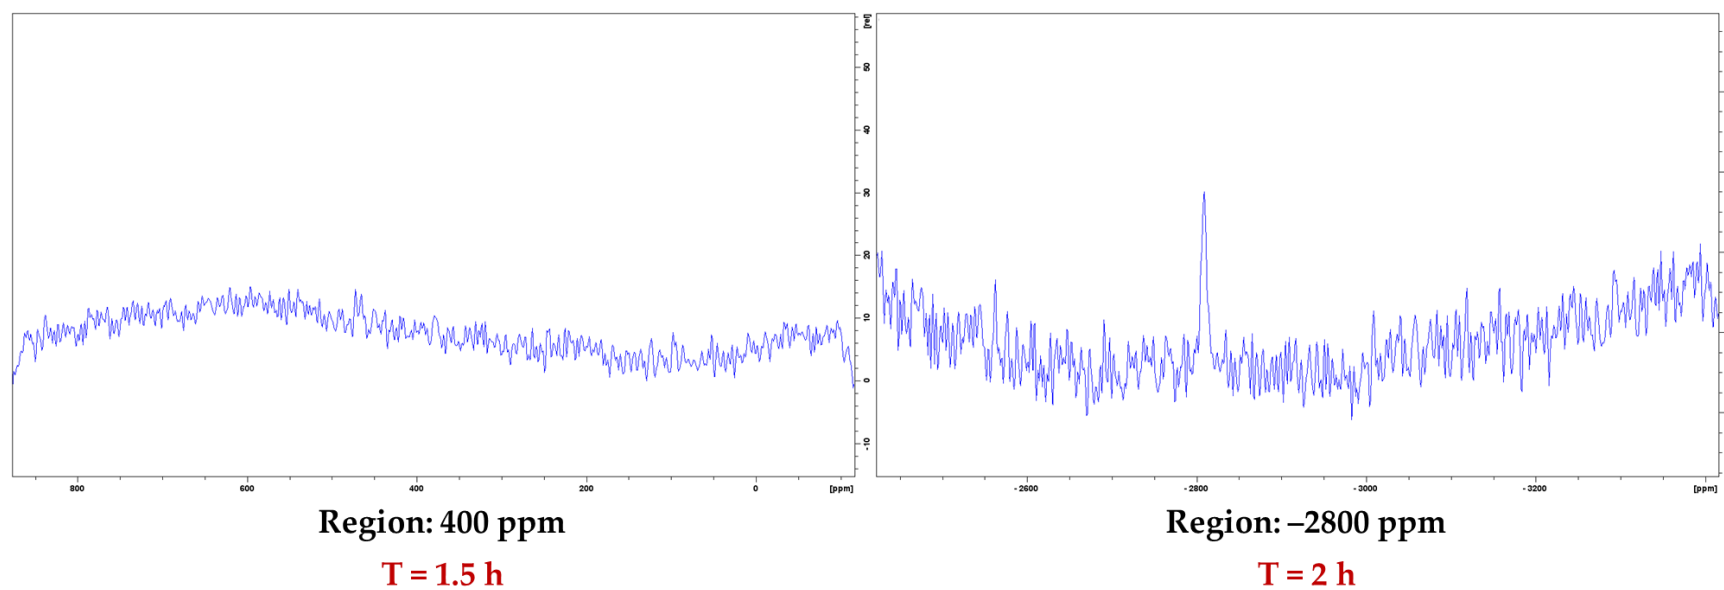

**Figure S34:** 1D- $^{195}\text{Pt}$ -NMR spectra of **5-5B3A** with PBS and AsA in DMSO- $\text{d}_6$ , within the regions of 400 and -2800 ppm at 37 °C, displaying its complete reduction after 2 h from the final  $^1\text{H}$ -NMR experiment.



**Figure S35:** <sup>1</sup>H-NMR spectra of 56-5B3A with PBS and AsA in DMSO-d<sub>6</sub> at 37 °C, in different time intervals, displaying the shift in chemical multiplicity. T is time in min.

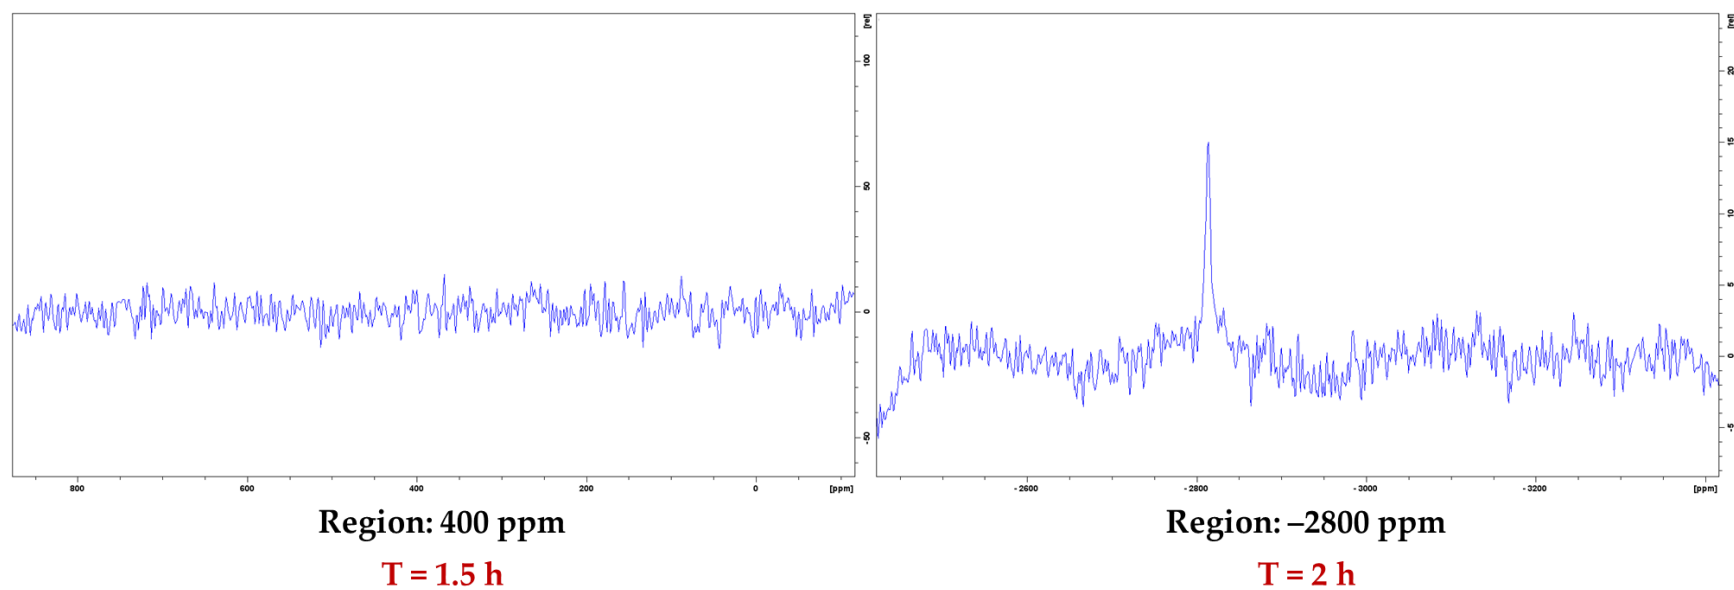

**Figure S36:** 1D- $^{195}\text{Pt}$ -NMR spectra of **56-5B3A** with PBS and AsA in DMSO- $\text{d}_6$ , within the regions of 400 and -2800 ppm at 37 °C, displaying its complete reduction after 1 h from the final  $^1\text{H}$ -NMR experiment.

## Stability Measurements for P-5B3A, 5-5B3A and 56-5B3A in PBS at 37 °C

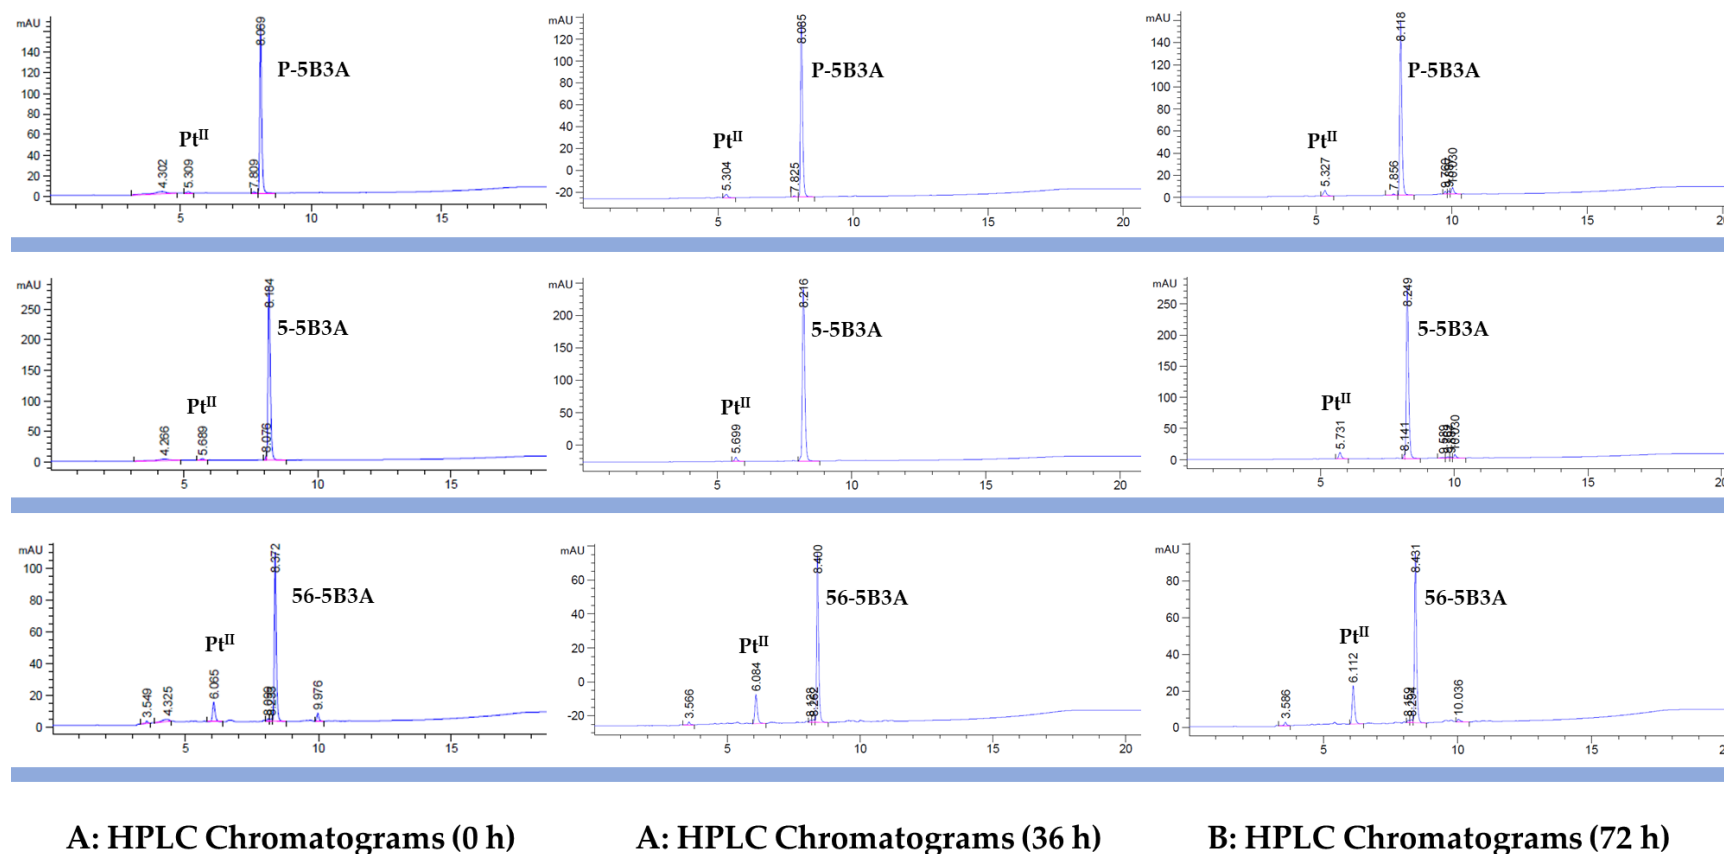

**Figure S37:** Combined HPLC chromatograms acquired for P-5B3A, 5-5B3A and 56-5B3A at 254 nm after treatment with PBS at 37 °C, at 0, 36 and 72 h.

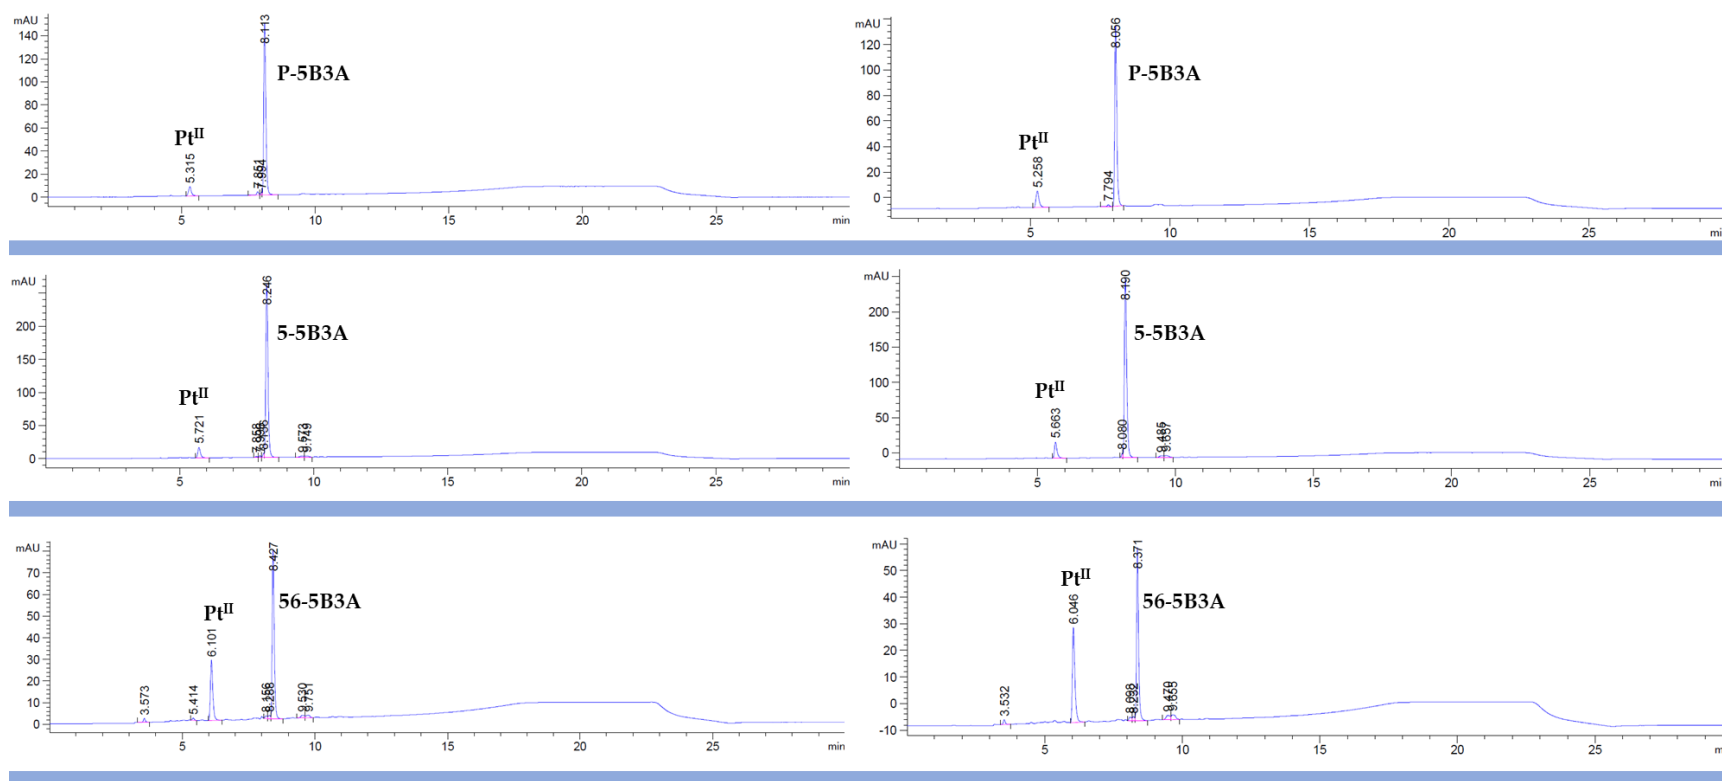

**A: HPLC Chromatograms (120 h)**

**B: HPLC Chromatograms (1 week)**

**Figure S38:** Combined HPLC chromatograms acquired for **P-5B3A**, **5-5B3A** and **56-5B3A** at 254 nm after treatment with PBS at 37 °C, at 120 h and 1 week.

## ROS Measurements

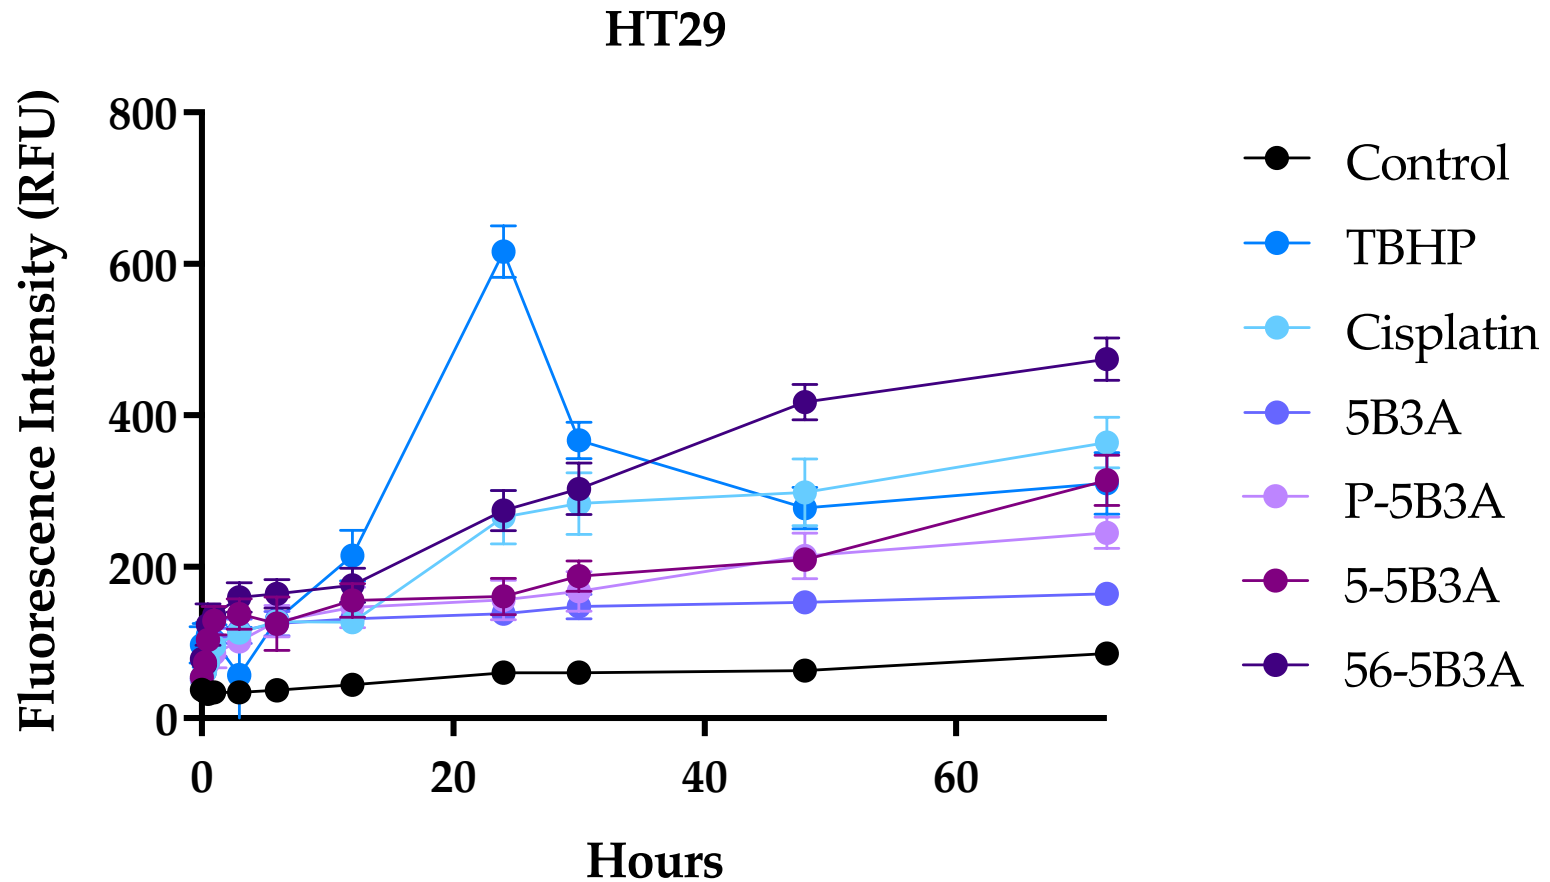

**Figure S39:** ROS production upon treatment with P-5B3A, 5-5B3A and 56-5B3A, and cisplatin in HT29 colon cells at 0, 0.25, 0.5, 1, 3, 6, 12, 24, 48 and 72 h. TBHP: tert-butyl hydroperoxide. Data points denote mean  $\pm$  SEM.  $n = 3$  from three independent experiments where samples were run in triplicates.

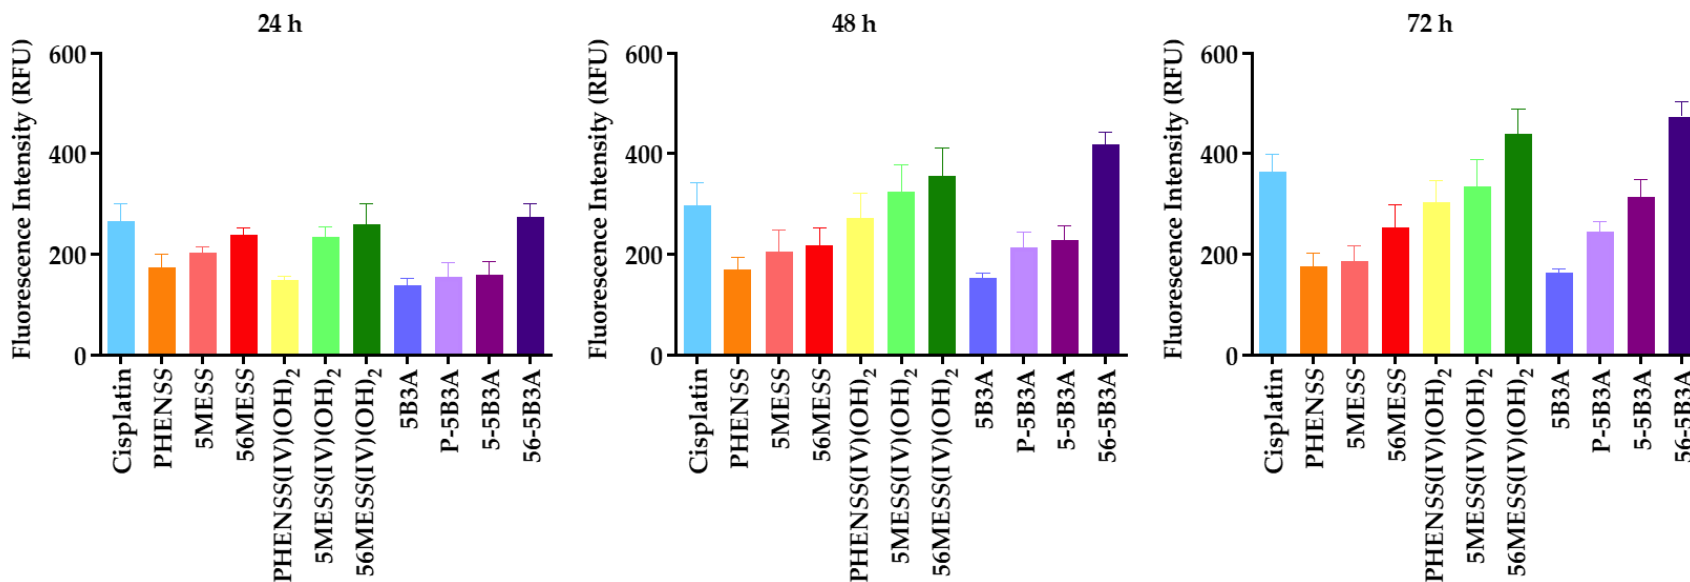

**Figure S40:** ROS generation in HT29 colon cells after treatment with **P-5B3A**, **5-5B3A** and **56-5B3A**, **5B3A**, the equivalent platinum(II) precursors (**PHENSS**, **5MESS** and **56MESS**) and platinum(IV) scaffolds (**PHENSS(IV)(OH)<sub>2</sub>**, **5MESS(IV)(OH)<sub>2</sub>** and **56MESS(IV)(OH)<sub>2</sub>**), and cisplatin at 24, 48 and 72 h. Data are expressed in RFU values. The RFU values of the platinum(II) precursors (**PHENSS**, **5MESS** and **56MESS**) and the platinum(IV) scaffolds (**PHENSS(IV)(OH)<sub>2</sub>**, **5MESS(IV)(OH)<sub>2</sub>** and **56MESS(IV)(OH)<sub>2</sub>**) were included in the diagrams for comparison. Data points signify mean  $\pm$  SEM.  $n = 3$  from three independent tests where samples were achieved in triplicate. Significance was identified by Tukey's multiple comparisons test for multiple comparisons compared with cisplatin, as measured by one-way ANOVA.

## MtMP Measurements

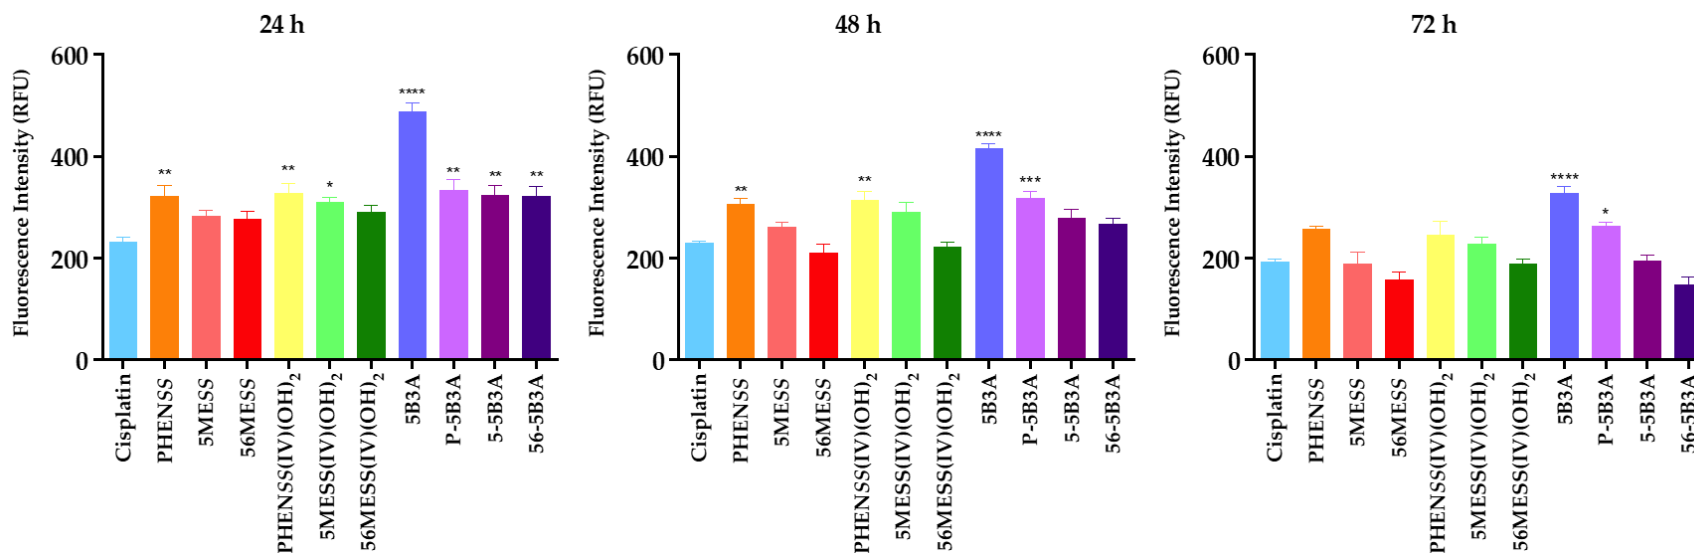

**Figure S41:** The detected MtMP changes in HT29 colon cells after treatment with **P-5B3A**, **5-5B3A** and **56-5B3A**, 5B3A, the equivalent platinum(II) precursors (**PHENSS**, **5MESS** and **56MESS**) and platinum(IV) scaffolds (**PHENSS(IV)(OH)<sub>2</sub>**, **5MESS(IV)(OH)<sub>2</sub>** and **56MESS(IV)(OH)<sub>2</sub>**), and cisplatin at 24, 48 and 72 h. Data are expressed in RFU values. Data points signify mean  $\pm$  SEM.  $n = 3$  from three independent tests where samples were achieved in triplicate. Significance was identified by Tukey's multiple comparisons test for multiple comparisons. Group differences were considered statistically significant if \*  $p < 0.05$ , \*\*  $p < 0.01$ , \*\*\*  $p < 0.001$  and \*\*\*\*  $p < 0.0001$  compared with cisplatin, as measured by one-way ANOVA.

## HDAC Measurements

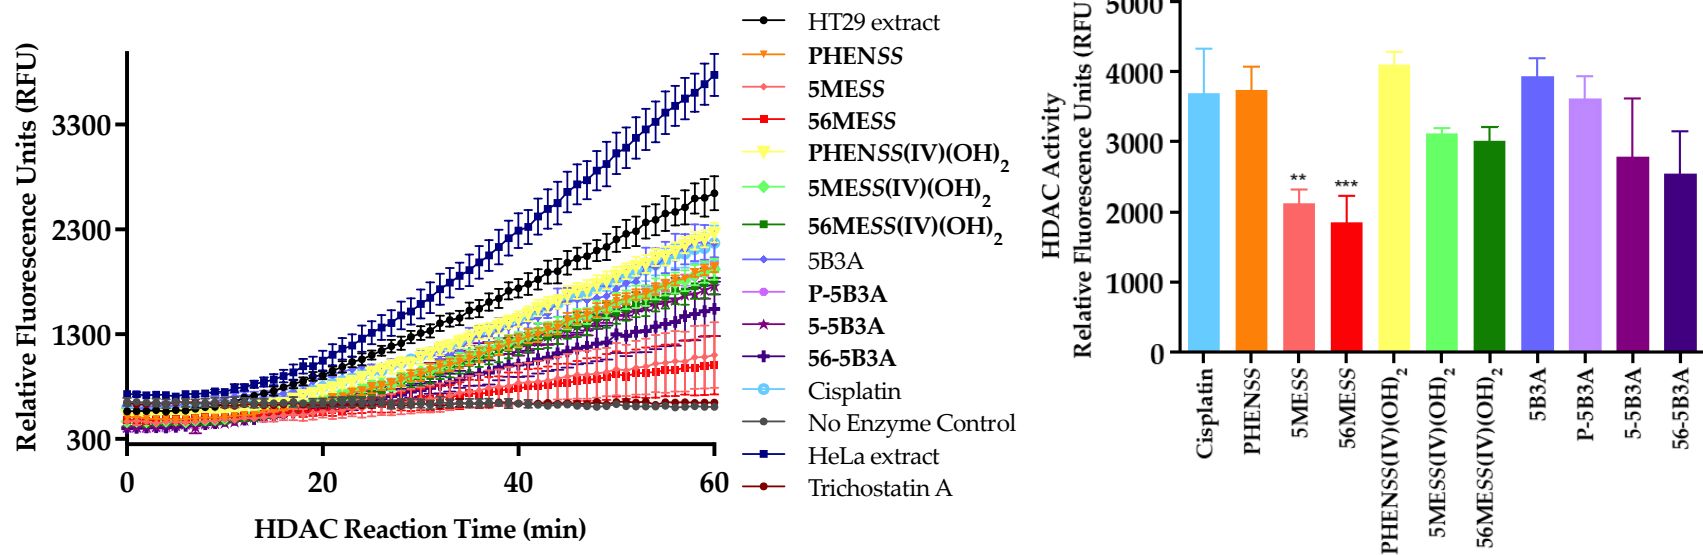

**Figure S42:** HDAC activity upon treatment with **P-5B3A**, **5-5B3A** and **56-5B3A**, **5B3A**, the equivalent platinum(II) precursors (**PHENSS**, **5MESS** and **56MESS**) and platinum(IV) scaffolds (**PHENSS(IV)(OH)<sub>2</sub>**, **5MESS(IV)(OH)<sub>2</sub>** and **56MESS(IV)(OH)<sub>2</sub>**), and cisplatin at 72 h. Data points signify mean  $\pm$  SEM.  $n = 3$  from three independent experiments where samples were conducted in triplicate. Significance was identified by Tukey's multiple comparisons test for multiple comparisons. Group differences were considered statistically significant if \*\*  $p < 0.01$  and \*\*\*  $p < 0.001$  compared with cisplatin, as measured by one-way ANOVA.
